# Supplementary material for: Transcriptional regulatory logic of the diurnal cycle in the mouse liver
Source: PubMed Central journal article supplement (PMC5393560; doi:10.1371/journal.pbio.2001069), 2017-04-17

**A**

DHS distance to the nearest active TSS

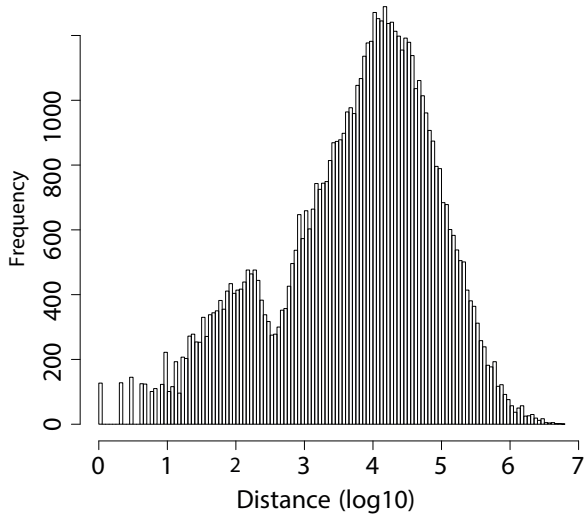**B**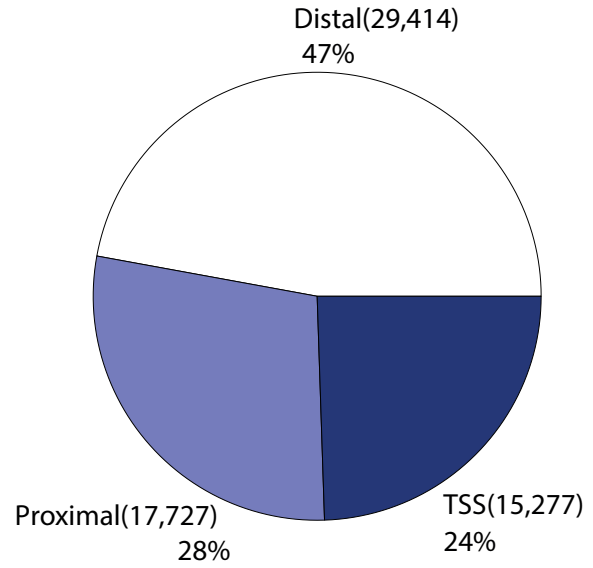**C**

Average normalized signal around active TSS

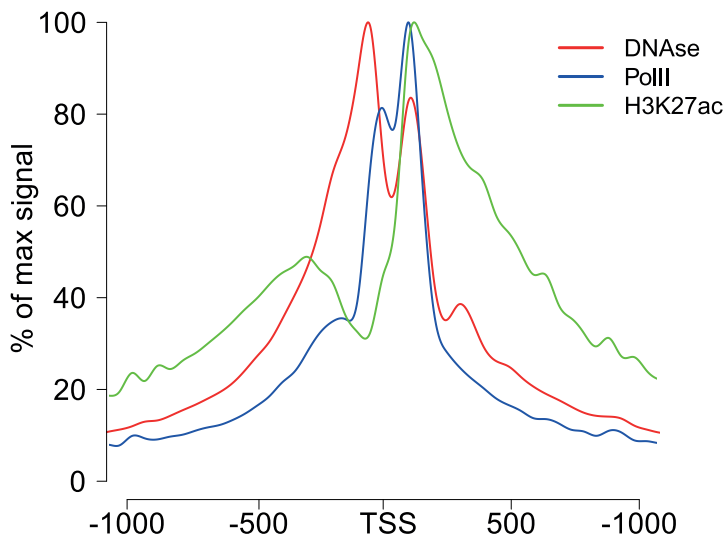**D**

Average normalized signal around Distal DHS

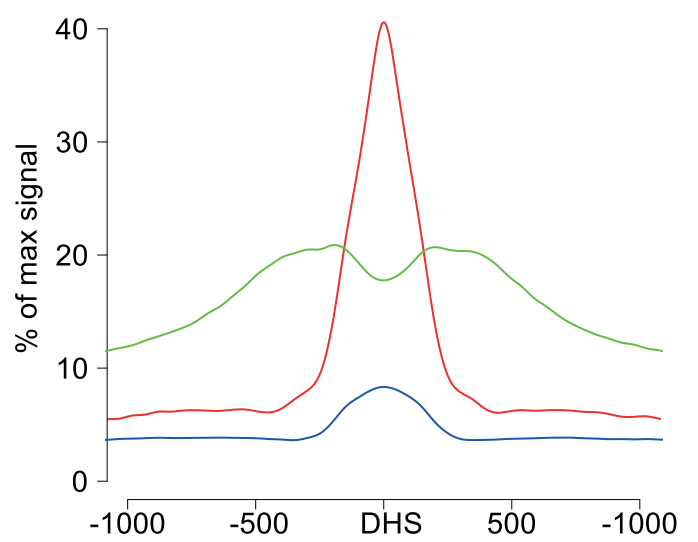**E**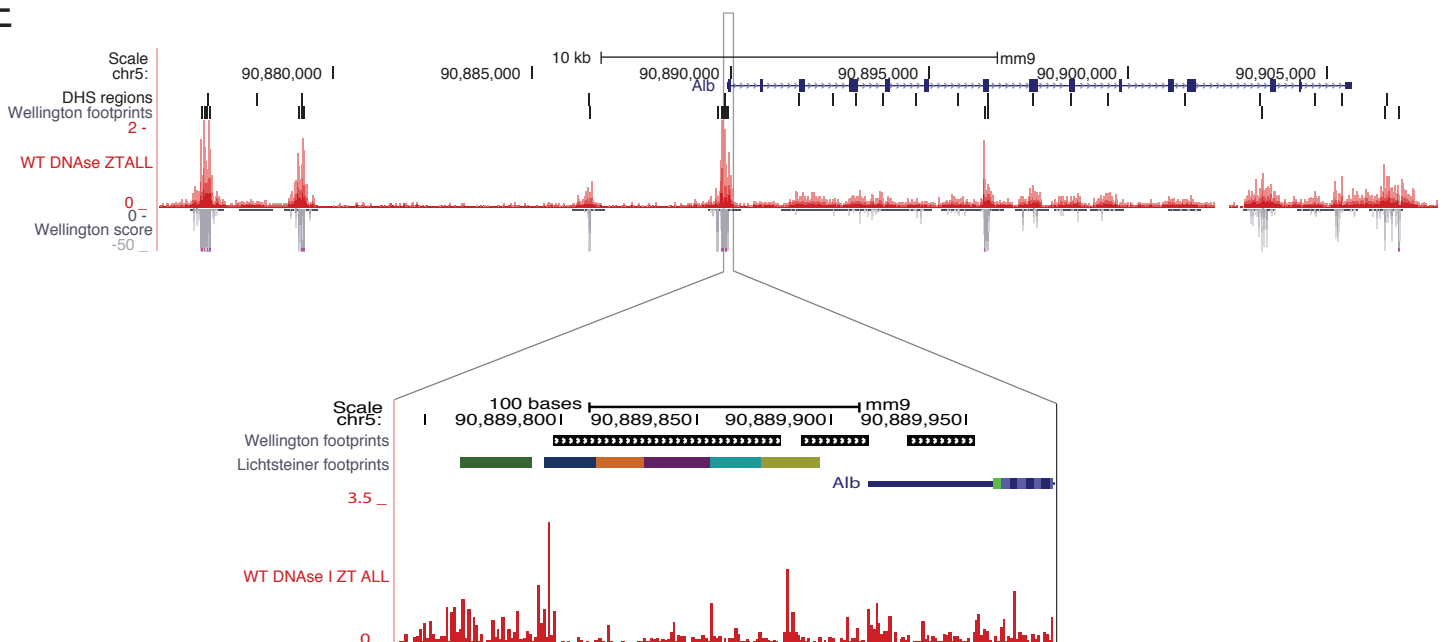

Supplement: pbio.2001069.s002.pdf [file pbio.2001069.s002.pdf]
