# Supplementary material for: Transcriptional regulatory logic of the diurnal cycle in the mouse liver
Source: PubMed Central journal article supplement (PMC5393560; doi:10.1371/journal.pbio.2001069), 2017-04-17

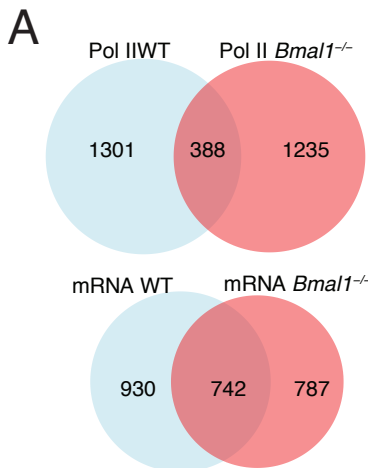

**B**

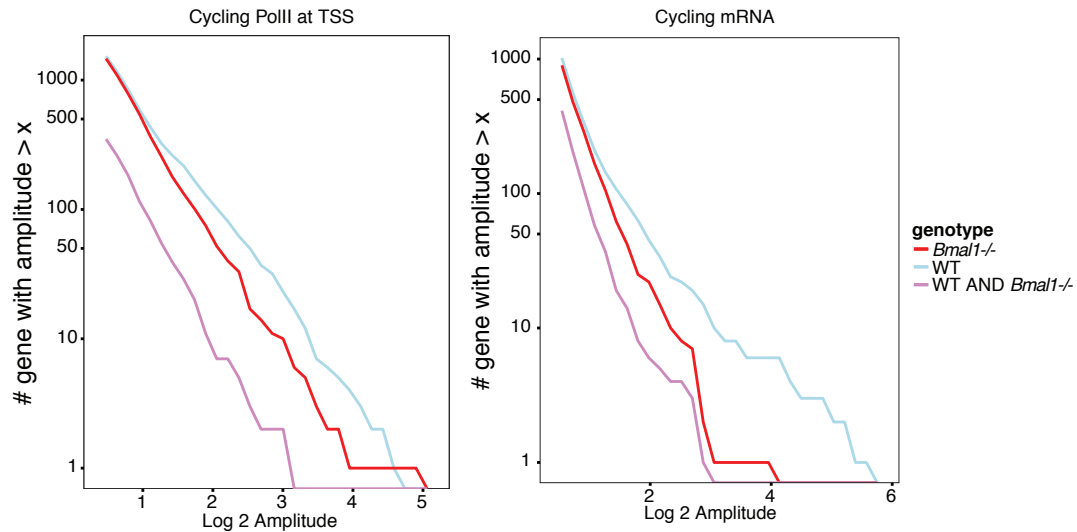

**C**

Pol II phase WT vs *Bmal1*<sup>-/-</sup>

circular cor = 0.815      Lag 1.31      circular AOV P-value: 8.8e-07

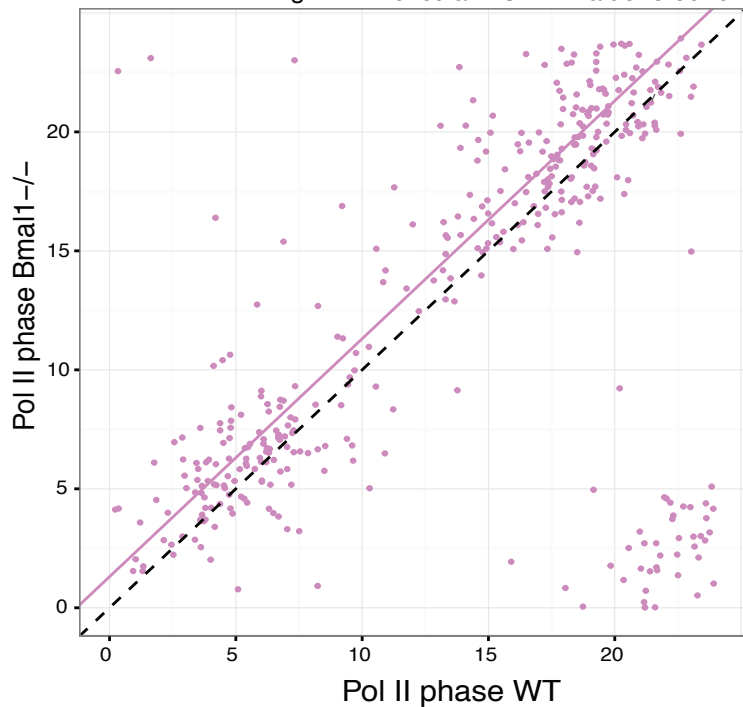

**D**

mRNA phase WT vs *Bmal1*<sup>-/-</sup>

circular cor = 0.775      Lag 0.528      circular AOV P-value: 0.0058

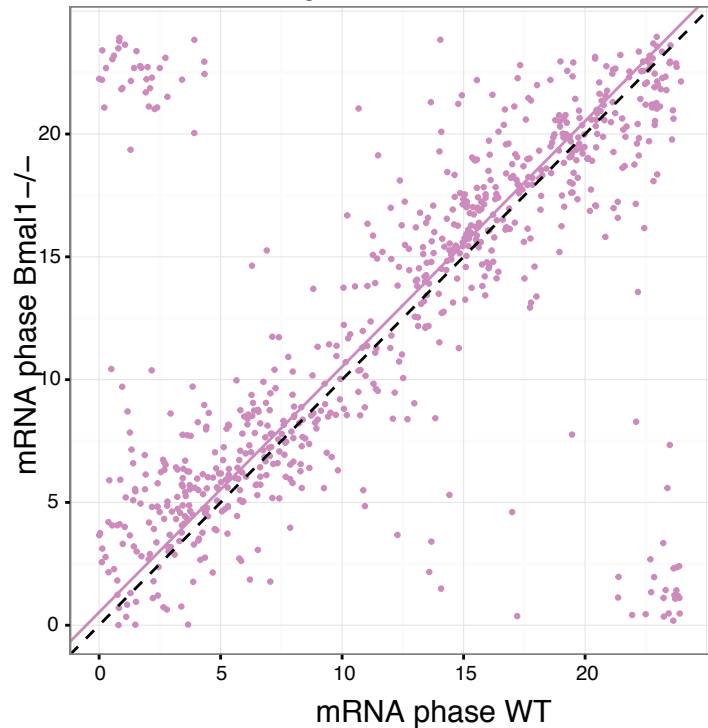

Supplement: pbio.2001069.s004.pdf [file pbio.2001069.s004.pdf]
