# Supplementary material for: Transcriptional regulatory logic of the diurnal cycle in the mouse liver
Source: PubMed Central journal article supplement (PMC5393560; doi:10.1371/journal.pbio.2001069), 2017-04-17
Supplement: pbio.2001069.s007.pdf [file pbio.2001069.s007.pdf]

**A**Nuclear extract  
CREB

WT

*Bmal1*<sup>-/-</sup>

ZT 0 2 4 6 8 10 12 14 16 18 20 22

0 2 4 6 8 10 12 14 16 18 20 22

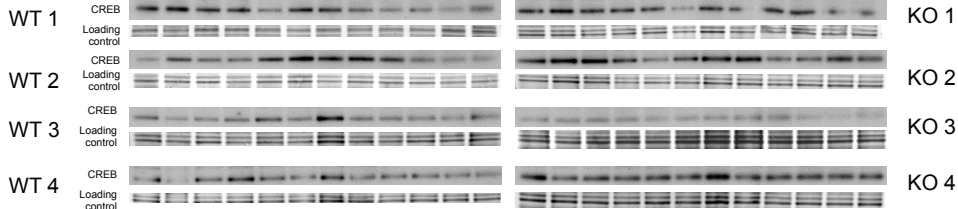Nuclear extract  
P-CREB

WT

*Bmal1*<sup>-/-</sup>

ZT 0 2 4 6 8 10 12 14 16 18 20 22

0 2 4 6 8 10 12 14 16 18 20 22

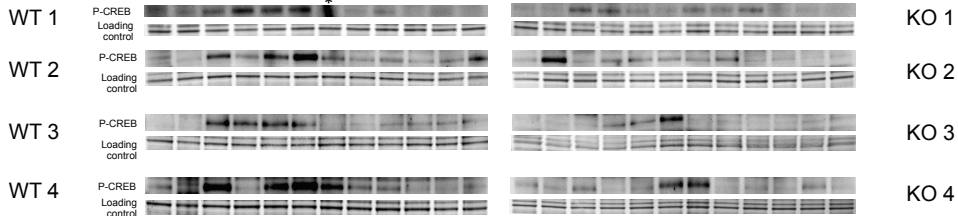

\* Unspecific signal
