# Supplementary material for: Transcriptional regulatory logic of the diurnal cycle in the mouse liver
Source: PubMed Central journal article supplement (PMC5393560; doi:10.1371/journal.pbio.2001069), 2017-04-17

## BMAL E1-E2 sp6

ZT2

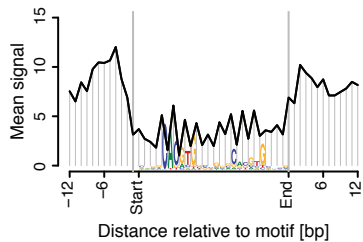

ZT6

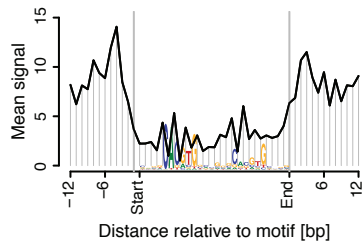

ZT10

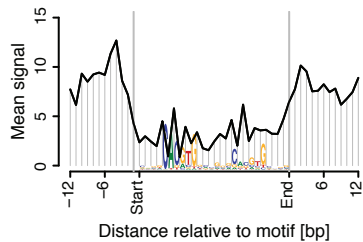

ZT14

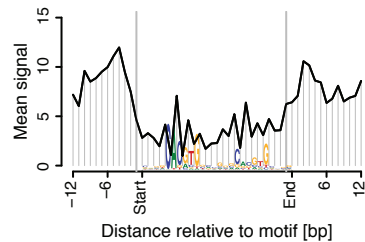

ZT18

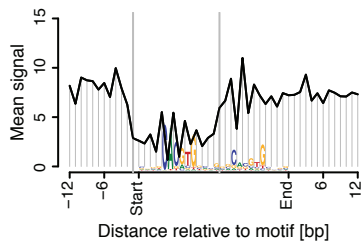

ZT22

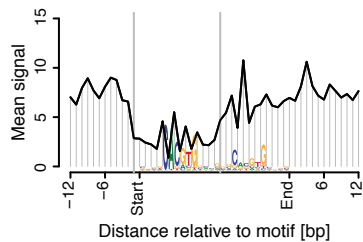

ZT26

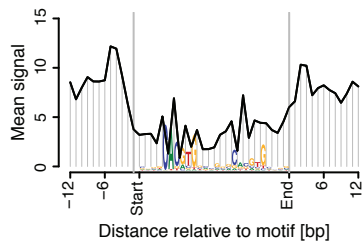

ZT6 *Bmal1*<sup>-/-</sup>

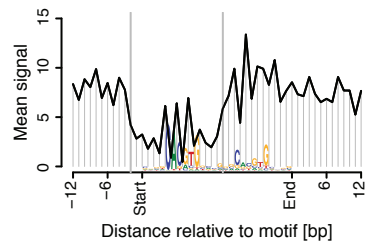

Supplement: pbio.2001069.s009.pdf [file pbio.2001069.s009.pdf]
