# Supplementary material for: Transcriptional regulatory logic of the diurnal cycle in the mouse liver
Source: PubMed Central journal article supplement (PMC5393560; doi:10.1371/journal.pbio.2001069), 2017-04-17

## BMAL E1-E2 sp7

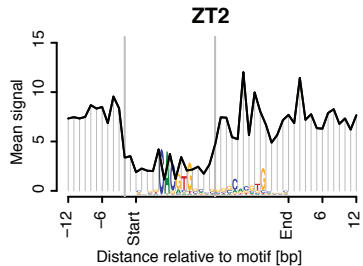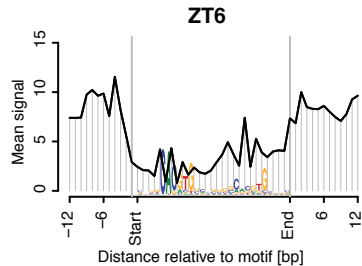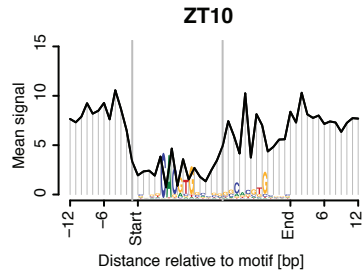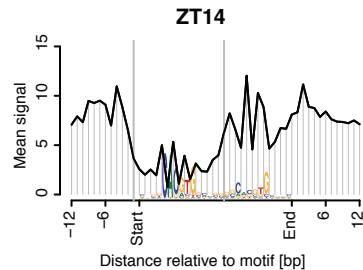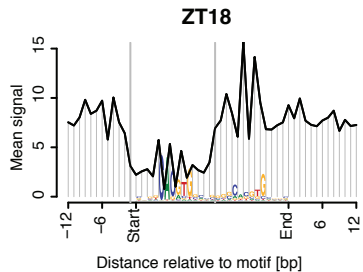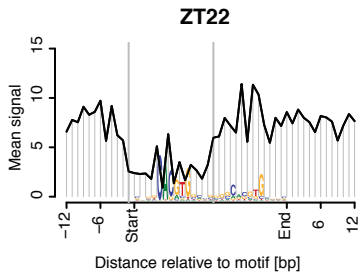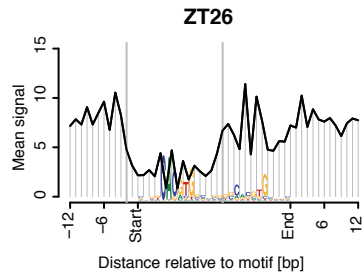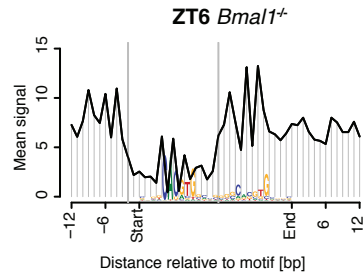

Supplement: pbio.2001069.s010.pdf [file pbio.2001069.s010.pdf]
