# Supplementary material for: Transcriptional regulatory logic of the diurnal cycle in the mouse liver
Source: PubMed Central journal article supplement (PMC5393560; doi:10.1371/journal.pbio.2001069), 2017-04-17

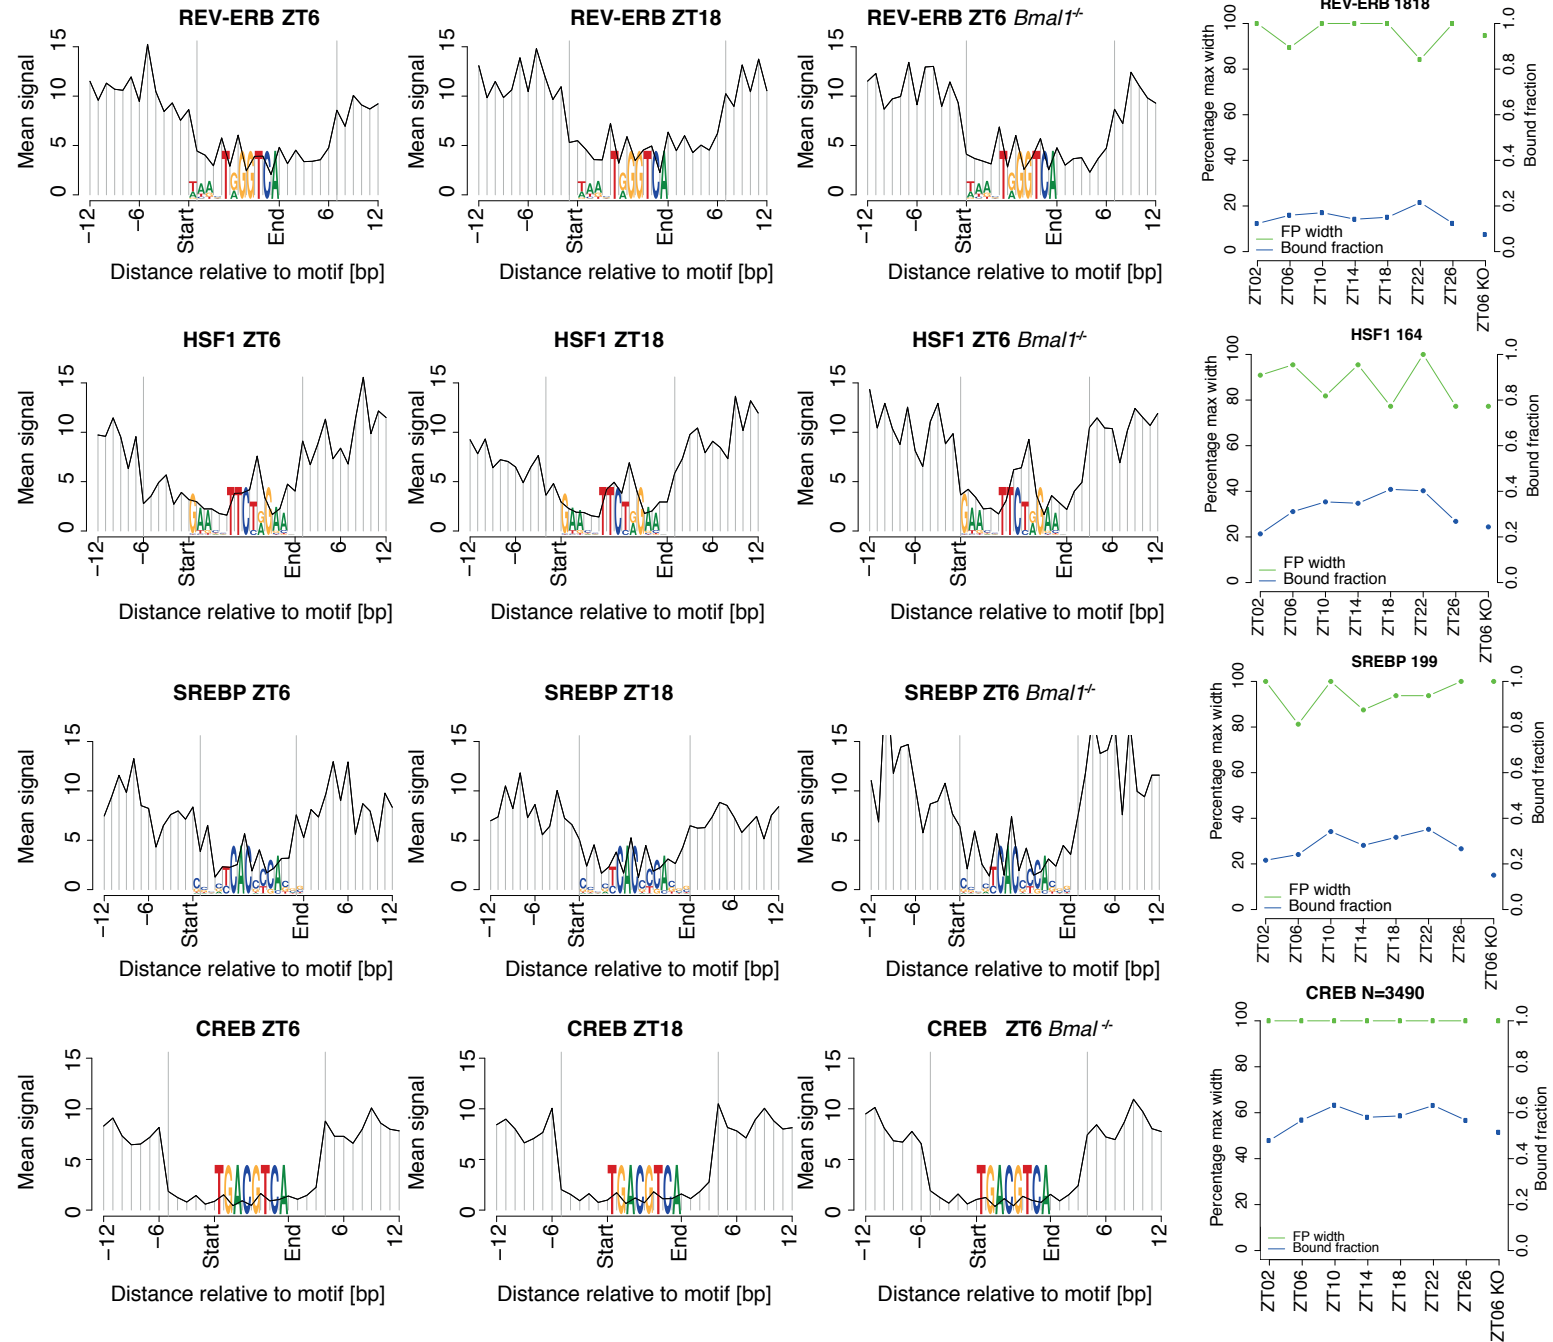

Supplement: pbio.2001069.s013.pdf [file pbio.2001069.s013.pdf]
