# Supplementary material for: Transcriptional regulatory logic of the diurnal cycle in the mouse liver
Source: PLoS Biol. 2017 Apr 17;15(4):e2001069. doi: 10.1371/journal.pbio.2001069 (PMC5393560; doi:10.1371/journal.pbio.2001069)
Supplement: S4 Table — Inferred activity (phase and amplitudes) for PWMs (DNA motifs) retained by the penalized generalized linear model using Pol II loadings at TSS and motif content in DHSs within 50kb from the gene TSSs. The consensus sequence, the source of the PWM, the number of targets and the sum of motifs in DHSs are listed. (XLSX) [file pbio.2001069.s018.xlsx]

## Sheet: table S4
Transcription factor motif	norm_WT	phase_WT	norm_KO	phase_KO	consensus	information_content	motif_sum	target_sum	Source	Labels
A-Box	-	-	0.00547583	6.92755	GGACAGGTGTTG	14.2775	13301	7141	Weng	other
AP1	-	-	0.00214366	23.3828	CCGGCAGGTGTCCGC	15.0478	10674	4386	Weng	other
AP2	0.00116237	9.07986	0.000919013	19.1459	CCCAATGGCGGTTGGGGG	13.0451	53107	10783	Weng	other
Ar_M188	-	-	0.0136898	8.2776	TAAACCGGAAGTTCGT	16.9436	5199	3708	Selex	GR
Ar_MA0007.1	-	-	0.0110262	11.8165	ATAAGAACATCGTGTACCCGCC	15.7034	8149	5122	Jaspar	GR
Ascl2_M118	0.00058763	4.6498	0.00174044	4.85514	TGCCAACTTCCCCATTAGTGGTCGCCTCCA	20.2289	21133	8429	Selex	other
Atf4_M127	0.00339926	7.98505	0.00307428	9.61744	TTGGCGCGAAAATTG	21.3265	5164	3889	Selex	other
B-Box	-	-	0.00439652	17.8685	ATTCTATTTATAGCTT	18.5439	10017	5766	Weng	other
BARHL2	0.00176894	20.8185	0.00461238	22.1147	ACCGGAAGTA	10.8219	8712	5509	Weng	other
BCL6B_M1	0.00260247	0.0755914	0.00127991	18.8948	GGACATGCCCGGGCATGTCT	33.7784	8695	5457	Selex	other
BHLHE40	0.0012052	1.25801	-	-	CCGATGACGTCATCCC	20.5104	11199	5405	Weng	E-box
CEBPA_MA0102.2	0.000925848	17.1537	-	-	TTTCGCAAT	8.71217	6096	3948	Jaspar	other
CEBPB	-	-	0.00202668	12.9809	CGTTATGTAACG	15.3986	7668	4949	Weng	other
CENPB_M34	0.00294579	8.92692	0.00379771	9.08862	TTTGGCGC	13.9362	5293	3857	Selex	other
CREB	0.00220361	4.44085	-	-	GGGAATTTCC	14.7621	8846	5549	Weng	CREB
CREB-ext	0.000578451	21.5856	-	-	GGGGATTTCC	10.8322	14655	7272	Weng	CREB
CREB3L1_M128	-	-	0.00826275	15.9662	CACCTGTTTTATTTGGCACGGTGCCAACT	23.7911	5069	3836	Selex	CREB
CREB3_M129	-	-	0.0019651	15.2853	TGTTTTGATTGACAACAAGAGGTG	17.5274	6420	4567	Selex	CREB
CTCF	9.24e-05	10.7103	0.00174922	8.6338	AGGGGGCGCAGCTGCGTCCCCT	18.9311	54693	11358	Weng	other
CTCF-ext	0.00270529	1.1177	0.00152366	0.689114	GATCTCCATTTTTGGAC	8.21146	26145	9537	Weng	other
CTCF_M2	0.00705449	17.0879	0.00247928	18.0849	GAAAAGTGAAACC	19.1479	20285	8745	Selex	other
CTCF_MA0139.1	0.000591969	23.9154	-	-	TGGCCACCAGGGGGCGCTA	17.2051	38124	10558	Jaspar	other
Cebpa_MA0102.1	-	-	0.00148507	11.3333	TTTCGCAATCTT	9.18699	6497	4363	Jaspar	other
Cebpb_M130	0.0135404	7.94544	-	-	GGGAACAGATGGTCTC	15.8949	3776	3007	Selex	other
Ddit3::Cebpa_MA0019.1	0.00681044	19.9029	0.00721149	16.8432	AGATGCAATCCC	11.6518	4990	3756	Jaspar	other
E2F1	0.000743336	18.3169	0.000397994	8.73301	CGTGATGGGG	6.16102	121049	11551	Weng	other
E2F4	0.00233714	19.6168	0.00130722	23.9773	AGATAAGATAAGATAA	25.2989	61149	11016	Weng	other
EBF1	-	-	0.0011503	6.50158	GGATATGATAAGATA	14.5291	30780	9143	Weng	other
EBF1_M44	0.0011593	7.92718	-	-	AGATAAGATAA	15.4684	14283	7039	Selex	other
EBF1_MA0154.1	0.00106979	10.2964	0.00138352	19.1223	ACCCAAGGGA	11.5645	22022	8632	Jaspar	other
EGR1	0.00143787	12.3499	0.00105274	18.8336	GGGTGAGGGGGAA	9.77485	115743	12147	Weng	other
EGR1_M3	-	-	0.00430491	3.57047	CGGCTCTATCATC	14.4076	39260	10505	Selex	other
ELF1	0.00418241	7.66674	-	-	GTTTGGGAATACC	11.8997	25093	9333	Weng	other
ELF4_M45	0.000940854	4.54075	-	-	GTTTGGGAATAC	9.0444	17973	8284	Selex	other
ELK1_M46	0.00197724	18.1774	-	-	CCAATAATCGAT	17.6166	11194	6594	Selex	other
ELK1_MA0028.1	0.000536347	15.5461	0.000374752	12.236	GAGCCGGAAG	8.81229	16750	7820	Jaspar	other
ELK4	0.00159879	7.66934	-	-	AATTTTCACGCATGAGTTCAC	15.1545	25093	9333	Weng	other
ELK4_MA0076.1	0.00322921	16.8276	-	-	ACCGGAAGT	14.1232	13134	6787	Jaspar	other
ERG_M47	-	-	0.0017584	19.6742	TATATCGATTATTTT	14.749	7533	5150	Selex	other
ESR1_M189	0.000755776	2.05932	-	-	CACCAATATGTATGG	16.517	10775	6212	Selex	other
ESR1_MA0112.1	0.00111714	17.2015	0.0012331	13.8971	CCAGGTCACCGTGACCCC	17.6826	27208	9476	Jaspar	other
ESR1_MA0112.2	0.00091027	19.5053	4.79e-05	11.9956	GGCCCAGGTCACCCTGACCT	13.5631	39952	10059	Jaspar	other
ESR2_MA0258.1	0.00132193	10.907	0.000419086	9.90871	CAAGGTCACGGTGACCTG	13.6177	22349	8291	Jaspar	other
ESRRA	-	-	0.000147886	19.2665	AGATTGTGCAATGT	10.6999	27865	9152	Weng	other
ESRRA_M190	0.0101241	20.878	-	-	TTGGTGACGTCC	11.5593	11845	6395	Selex	other
ESRRA_M191	0.00570131	13.451	-	-	GGGGGTTGACGTATA	16.2536	13630	6910	Selex	other
ETS1	-	-	0.000875946	14.0537	ATGACGCATACCCCC	25.1704	28769	9850	Weng	other
ETS1_M48	0.000876094	1.29534	-	-	ATATTGCAAAATCA	7.11606	9130	5842	Selex	other
EWSR1-FLI1_MA0149.1	0.000146252	23.0649	0.000121387	19.9904	GGAAGGAAGGAAGGAAGG	32.8715	81582	11281	Jaspar	other
En1_MA0027.1	0.0100622	7.29555	-	-	AAGTAGTGTTC	6.42107	6931	4794	Jaspar	other
Esrra_M192	0.00571462	17.7986	0.00524527	20.0437	TACCACGTGTCA	11.2587	12196	6446	Selex	other
Esrra_M193	0.00623441	9.29168	0.00220021	16.4265	CACATCAATCAAATT	16.8154	11852	6217	Selex	other
Esrrb_MA0141.1	0.00184084	3.25534	-	-	AGCTCAAGGTCA	12.8062	21009	8295	Jaspar	other
Evi1_MA0029.1	0.00542851	14.4719	-	-	AAGATAAGATAATA	17.9085	4922	3435	Jaspar	other
FEV_MA0156.1	-	-	0.00058659	19.6038	CAGGAAAT	12.1209	15019	7780	Jaspar	other
FOXA	0.000883246	19.1009	0.00274151	19.3862	TATTGTTTATTT	15.0164	13666	6697	Weng	FOX
FOXA1_MA0148.1	-	-	0.000200398	18.432	TGTTTACTTTG	12.5328	14835	7032	Jaspar	FOX
FOXB1_M137	0.00579216	18.0709	-	-	GGTTAATGATTACCA	14.5876	7323	4311	Selex	FOX
FOXB1_M138	0.0106553	3.93926	0.0128919	5.08801	GGGGAATTAGAGTTG	10.6638	7497	4869	Selex	FOX
FOXD1_MA0031.1	-	-	0.00630129	3.2919	GTAAACAT	11.9264	5780	4098	Jaspar	FOX
FOXF2_MA0030.1	0.00247107	1.18217	-	-	CAAACGTAAACAAT	14.8238	5869	4156	Jaspar	FOX
FOXI1_MA0042.1	0.00274289	0.221724	-	-	GGATGTTTGTTT	13.183	14069	5824	Jaspar	FOX
FOXJ2_M142	0.000542358	1.02515	-	-	TCGAGGCGCAGTGATGCGTAGCGGCCCC	19.4821	13665	6103	Selex	FOX
FOXJ2_M143	0.00548045	21.7939	0.00249298	0.104656	GACGTGATTTCTGAAGCGTGACGATAGC	25.0815	10946	5323	Selex	FOX
FOXO1_M145	0.00162937	18.2086	-	-	AGAATGTTCG	8.15881	3606	2847	Selex	FOX
FOXO1_M146	-	-	0.00116479	18.1226	AAACAAA	6.86191	19380	8231	Selex	FOX
FOXO3_MA0157.1	0.00018955	7.53022	0.00511006	5.10666	TGTAAACA	11.7337	8383	5233	Jaspar	FOX
Fos_MA0099.1	0.0018256	1.74598	-	-	GTGAGTCA	10.6698	5653	3541	Jaspar	other
Foxa2_MA0047.1	0.00513174	3.93222	0.00466889	4.3455	CAATATTTACTT	12.4332	9672	5240	Jaspar	FOX
Foxc1_M147	0.00338278	13.9214	-	-	ATAAGTAGGTCAA	17.4777	15409	6090	Selex	FOX
Foxc1_M148	0.0013479	6.63329	0.00416215	3.22016	TGACCTTTGAACCT	15.9239	5878	4034	Selex	FOX
Foxd3_MA0041.1	0.00846404	20.4085	0.00108951	15.9512	GAATGTTTGTTT	12.9448	15528	6030	Jaspar	FOX
Foxg1_M150	0.00158158	7.80902	0.0033601	3.46918	CTAATTTGCATATT	17.4993	10995	6140	Selex	FOX
Foxq1_MA0040.1	-	-	0.00370467	3.8146	TATTGTTTATT	14.0703	4694	3412	Jaspar	FOX
GABP	0.000439456	7.67046	-	-	GGTGACTCAGT	9.8421	25093	9333	Weng	other
GABPA_MA0062.1	-	-	0.00142125	12.3088	ACCGGAAGAG	13.8895	26178	9757	Jaspar	other
GABPA_MA0062.2	-	-	0.000378981	5.85792	CCGGAAGTGGC	13.3349	25803	9408	Jaspar	other
GATA3	0.0021984	22.1867	-	-	GGTGACGTAACT	15.1177	7538	4594	Weng	other
GCM1_M56	-	-	0.00610676	17.9894	AGCACCTGTC	11.025	6818	4644	Selex	other
GFI1	0.00596502	17.418	0.0020497	20.9702	GTCCATATAAGGAC	14.9149	8922	5586	Weng	other
GLI2_M4	0.000865623	8.91155	0.00420344	12.5678	GTCACGTGGC	10.1609	21288	8908	Selex	other
GLI2_M5	0.000722588	11.3262	0.00153822	15.0029	GGTGACTCAGT	10.3663	11162	6551	Selex	other
GLIS1_M6	-	-	8.45e-05	4.69772	CGCCCGCCGGCG	10.3436	10998	6486	Selex	other
GLIS2_M7	-	-	0.00206051	19.5537	ACATTGCGTAATTA	7.11447	22130	8818	Selex	other
GMEB2_M101	0.00585639	21.8312	-	-	TCAGGTCACTGTGACCTGA	11.6828	3709	2829	Selex	other
GRHL1_M36	0.00723735	7.8376	-	-	TGGGGACTTTCCTC	14.4943	3306	2719	Selex	other
Gfi_MA0038.1	-	-	0.00105754	17.8223	CAAATCACTG	9.47017	9139	5461	Jaspar	other
HIC2_M8	0.00282811	19.5628	-	-	ACCAATCAACTCGCTTCTCGCTTCT	21.6007	14123	7148	Selex	other
HIF1A::ARNT_MA0259.1	-	-	0.0013651	7.37822	GGACGTGC	9.73983	7582	5038	Jaspar	E-box
HINFP1_M10	0.00232049	8.29942	0.00308878	5.22145	AGATAAGGCCT	10.0872	34143	9817	Selex	other
HINFP1_M11	0.00503207	8.195	-	-	GGTACAATCTGTTCTG	18.0087	41943	10300	Selex	other
HINFP1_M9	0.00222018	17.2563	0.00109451	18.0348	AGTTAATTATTAACCAA	17.3511	21895	8791	Selex	other
HMBOX1_M160	0.000226324	17.0689	-	-	TCTGATTGGTTAGT	19.0426	2753	2250	Selex	other
HNF1A_M161	0.00392438	18.9089	0.000683321	21.6174	CTCATTTGCATAC	16.4579	6164	3840	Selex	other
HNF1B_MA0153.1	0.00937222	18.5951	0.00646546	21.1959	TTAATATTTAAC	16.8212	5068	3470	Jaspar	other
HNF4	-	-	0.00242918	2.28017	AACACGGATATCTGTGGTC	28.1	28927	9227	Weng	other
HNF4A_M194	-	-	0.00160503	3.23417	GCCATATATGGCCAG	16.4188	10972	6217	Selex	other
HNF4A_M196	-	-	0.00560004	22.9748	CCACGTGC	10.1669	18676	7998	Selex	other
HNF4A_MA0114.1	0.00151078	2.35156	0.00274631	7.312	AGGCCAAAGGTCA	9.61742	29920	9452	Jaspar	other
HOXC12_M162	0.00246929	16.7422	-	-	TTCCCGGAA	12.7944	4148	3196	Selex	other
HSF1	0.00892908	16.8274	0.00441434	15.9441	TCTAACGGC	10.9988	13796	7023	Weng	HSF
HSF1_M61	0.000193947	9.20681	0.000437232	10.9833	GTTACGTAAT	12.7587	6494	4307	Selex	HSF
Hand1::Tcfe2a_MA0092.1	-	-	0.00359545	7.89847	GGTCTGGCAT	10.1436	11248	6181	Jaspar	other
Hic1_M12	0.00216831	16.1828	0.00150528	17.9731	TTAGGGTTGCGTGCCG	13.3766	24645	9009	Selex	other
Hic1_M13	-	-	0.00308871	17.5482	GTTGTCACGTGCTCGC	12.9757	11893	6353	Selex	other
Hltf_MA0109.1	0.00295695	8.65609	0.000190695	20.6601	AACCTTATAT	7.46926	3704	2816	Jaspar	other
INSM1_MA0155.1	0.00157087	23.8548	-	-	TGTCAGGGGGCG	14.8617	25232	9218	Jaspar	other
IRF1_MA0050.1	0.0066233	17.5914	0.00296643	20.3969	GAAAGTGAAACC	16.008	11655	6331	Jaspar	other
IRF2_MA0051.1	0.00506592	1.73148	-	-	GGAAAGTGAAAGCAAAAC	21.1344	7830	5061	Jaspar	other
IRF3_M64	0.00221373	20.298	0.000400414	21.4308	ATGCGTGGGCGT	17.46	13271	6629	Selex	other
IRF5_M66	0.00558406	20.0325	-	-	ATGCGTGGGCGT	17.8865	3149	2584	Selex	other
IRX2_M166	0.00819138	7.06236	-	-	AGATGCAATCCCC	12.3673	3304	2614	Selex	other
ISL2_M167	0.0019976	23.4408	-	-	ACAAAATAAATCACAGCATATGCC	12.9215	4092	3190	Selex	other
Irx3_M169	0.00247428	5.3828	0.00827185	5.94374	GTATAAAAGGCGGGG	10.0863	3700	2795	Selex	other
KLF13_M14	0.000636489	15.8113	-	-	ACTAGCCAATCA	10.7512	17008	7727	Selex	other
KLF16_M15	0.000780028	2.91021	0.00410587	3.25104	AGGGGGCGGGGCTG	11.5381	103928	11986	Selex	other
Klf12_M16	0.00011829	10.6654	0.00128763	0.564634	TTCAGCACCACGGACAGCGCC	30.1268	42665	10582	Selex	other
Klf4_MA0039.1	0.00617956	9.14618	0.000787732	11.6403	TAAAGGAAGG	7.2334	26671	9166	Jaspar	other
Klf4_MA0039.2	-	-	0.000241012	6.44999	TGGGTGGGGC	12.6184	83696	11872	Jaspar	other
Lhx3_MA0135.1	0.00231445	15.9686	-	-	AAATTAATTAATC	16.3541	3554	2304	Jaspar	other
MAX	0.000591521	8.09145	0.00263247	9.54228	TTGGCCGCGAATCGTGGTGCA	17.9582	16893	6637	Weng	E-box
MAX_M123	0.00508143	8.23569	-	-	CGCCAGGTGCTG	11.2621	7368	4747	Selex	E-box
MEF2A_M69	0.00147501	7.6583	-	-	TAGTAGCCATGGCAACAA	13.0826	3851	2928	Selex	other
MEIS2_M73	0.00090406	4.87421	-	-	ATCAGCCAATCAGAGC	12.7729	14219	7118	Selex	other
MGA_M106	0.000838021	4.47274	-	-	GGTAAGTAAATAAACA	17.6458	3902	3083	Selex	other
MSC_M235	0.00227538	3.74119	0.000779043	2.70243	TATACATAAACAAGAT	13.1176	14163	7061	Selex	other
MTF1_M217	-	-	0.000106289	22.5627	GATTGGTGG	15.7495	9865	6156	Selex	other
MYC::MAX_MA0059.1	-	-	0.00432482	17.8416	GAGCACGTGGT	14.237	12893	5959	Jaspar	E-box
MZF1_5-13_MA0057.1	0.00135407	8.20486	-	-	CGTTCGGCGCCAAAAGG	10.6562	25043	8952	Jaspar	other
M_MACHO1_01	0.00135318	2.54053	-	-	CTCTATAAATCGCGGCG	13.5172	16789	7730	Jaspar	other
Mafb_M133	0.00269776	12.2589	0.00314698	17.503	GCCACGCGCG	10.1762	7487	4962	Selex	other
Mafb_M134	0.00450758	6.77393	-	-	TTCCGGCCCCACGCAGGGGCC	13.773	6033	4371	Selex	other
Meis2_M74	0.00927509	3.35095	-	-	TTCAGCACCTCGGAGAGCGCC	28.8074	10958	5882	Selex	other
Myc_MA0147.1	0.00189784	12.1862	0.00212681	16.0471	CGCACGTGGC	11.1572	12617	6870	Jaspar	other
NF-kappaB_MA0061.1	-	-	0.00235701	2.85873	GGGAATTTCC	13.3448	14311	6963	Jaspar	other
NFAT5_M80	0.00130999	7.87151	-	-	CGGGGGCGCGCTT	7.55848	7383	4968	Selex	other
NFATC1_M82	0.00538705	19.7725	-	-	GTGACGTCAACG	14.1822	4380	3492	Selex	other
NFATC1_M83	0.00195311	6.30232	0.000511379	5.69036	ACAGGAAGTGATTGC	13.7753	3793	2894	Selex	other
NFATC2_MA0152.1	0.00295637	6.1373	0.000686126	11.3495	TTTTCCA	9.85861	8113	5163	Jaspar	other
NFE2	0.000926534	8.08877	0.00299501	23.9256	ACCGGAAGTGCA	15.41	8598	5298	Weng	other
NFE2L2_MA0150.1	0.00422454	15.4496	0.0026545	20.8754	ATGACTCAGCA	14.3936	10095	5923	Jaspar	other
NFIA_M238	0.00625535	19.7438	-	-	ATAGATAAGA	12.1139	10221	5966	Selex	other
NFIA_M85	-	-	0.00220301	6.64087	AGAGATAAGA	11.074	17838	7835	Selex	other
NFIL3_M135	0.0244328	11.3269	0.000230508	10.5807	AGAGATAAGA	9.8363	4455	3410	Selex	D-box
NFIL3_MA0025.1	0.0282667	12.4877	-	-	TTATGTAACGT	14.1385	3597	2447	Jaspar	D-box
NFY	0.00635251	18.7544	-	-	AAAAATTAACCCAAAATCCAACCTCACCCC	10.7349	18775	7848	Weng	other
NFY-UA2	0.000779163	6.38222	0.00438638	12.1236	CCGTAATTG	4.94061	14544	7295	Weng	other
NHLH1_MA0048.1	0.00476634	22.8643	-	-	GCGCAGCTGCGT	14.1315	24517	9289	Jaspar	other
NR1H2::RXRA_MA0115.1	0.00773159	6.81323	0.00949986	9.65909	AAAGGTCAAAGGTCAAC	27.878	16448	7417	Jaspar	other
NR2C2	0.00110005	10.5876	-	-	ATGCTAAAAATAGATTG	19.0342	41112	10556	Weng	other
NR2C2_M197	0.000944694	16.8489	-	-	TAAGAACAATGGGA	11.0509	22289	8571	Selex	other
NR2F1_M198	0.00473105	23.3053	-	-	GGGGTCAAAGGTCAC	17.1763	15614	7325	Selex	other
NR2F1_M199	0.00174781	21.9742	0.000598313	14.0622	TACTTACCTGTGT	13.2037	17417	7670	Selex	other
NR2F1_M236	-	-	0.00486265	14.9932	ATTCACCTGTAC	11.5635	19893	8045	Selex	other
NR2F1_MA0017.1	0.00271035	18.3269	0.000621809	20.5407	TGACCTTTGAACCT	15.9239	22733	8531	Jaspar	other
NR3C1	-	-	0.00125138	6.12655	CTGTTTCTG	9.85853	14537	7159	Weng	GR
NR3C1_MA0113.1	0.00227071	7.57809	0.00585949	7.27404	GGGAACATTATGTCCTGT	14.7489	6836	4656	Jaspar	GR
NR4A2_M200	0.00114017	23.4226	-	-	AGCTGTCAGTA	13.4943	6247	4257	Selex	other
NR4A2_M202	0.00819432	9.65292	-	-	TGACAGTTTTACGA	18.5637	9803	5742	Selex	other
NRF1	-	-	0.000997674	18.7353	TTATAAATAAACATTCAA	13.8591	55683	10177	Weng	other
Nkx3-2_MA0122.1	0.000233638	1.44381	-	-	TTAAGTGGA	8.54225	7499	5052	Jaspar	other
Nr2e3_MA0164.1	-	-	0.00602941	16.3706	CAAGCTT	12.0284	5396	3455	Jaspar	other
PAX1_M87	0.0114439	13.7008	0.000308798	16.0668	GATTTAATGACC	13.6221	6997	4893	Selex	other
PAX5	0.00121327	9.90028	0.00220034	22.1207	GGGTGAGGGGGGTGA	11.7669	44403	10792	Weng	other
PBX1_MA0070.1	0.0101095	9.16829	-	-	CCATCAATCAAA	14.6409	4844	3152	Jaspar	other
PLAG1_MA0163.1	0.000607216	10.7012	0.00159314	10.8111	GGGGCCCAAGGGGG	19.3519	50327	10792	Jaspar	other
POU1F1_M90	0.00387974	12.9102	-	-	GGGGTGGTC	5.51733	4185	2981	Selex	other
PPARG::RXRA_MA0065.1	-	-	0.000403062	20.1064	TTAGGGGTCAAAGGTCATCT	23.4489	20835	8216	Jaspar	other
PPARG::RXRA_MA0065.2	0.00271468	10.0753	0.00490734	9.2443	GTAGGGCAAAGGTCA	11.6631	41348	10374	Jaspar	other
PPARG_MA0066.1	0.00768417	7.68949	0.00592566	4.09699	GTAGGTCACGGTGACCTACT	20.3651	12346	6171	Jaspar	other
PRDM1	0.00120517	10.7368	0.000506299	7.64738	AAAGATAAGC	6.96623	16395	7573	Weng	other
PRDM1_M17	0.00517903	6.05259	-	-	ATGCATTTATTCAT	21.3777	13833	7009	Selex	other
PROX1_M95	0.00214048	7.29628	-	-	GCATAATTTAT	15.2714	3867	3089	Selex	other
PU1	0.00301291	20.3092	0.00239155	21.4508	CGTACGTGCGGT	12.9705	20317	8540	Weng	other
Pax4_MA0068.1	0.00324916	9.57106	-	-	GAAAAATTTCCCATACTCCACTCCCCCCCC	11.0045	16332	6719	Jaspar	other
Pax5_MA0014.1	0.00312137	7.00265	0.0042759	5.06316	GGAGCACTGAAGCGTAGCGG	12.432	28445	9838	Jaspar	other
Pou5f1_MA0142.1	0.00854506	8.69151	0.00695139	6.59683	CTTTGTTATGCAAAT	14.8078	5526	3892	Jaspar	other
RARA_M205	0.00109214	7.36966	0.00135769	2.55935	GTGTTGTTTACGTT	15.4713	13481	6777	Selex	other
RARA_M206	0.000582432	21.3169	-	-	ATGTTGTTTACGTT	16.0024	9932	5875	Selex	other
RARA_M207	0.00132089	14.0952	0.0107255	15.9113	TTGTTGTTTACATA	16.3899	15370	7296	Selex	other
REL_MA0101.1	-	-	0.00147506	18.5426	GGGGATTTCC	10.5148	11498	6485	Jaspar	other
REST	0.00847256	17.1443	0.00429677	15.8422	GGTACAGGGTGTTCT	14.4894	25310	9257	Weng	other
REST_MA0138.1	0.0013298	9.30895	0.00200037	15.3661	GCGCTGTCCATGGTGCTGA	22.9583	36568	10468	Jaspar	other
REST_MA0138.2	0.00291576	20.4212	0.000337855	21.009	TTCAGCACCATGGACAGCGCC	23.1339	28467	9679	Jaspar	other
RFX2_M96	-	-	0.000511945	14.2893	CGGTAATTGG	4.72712	5094	3814	Selex	other
RFX5	-	-	0.0046592	10.5669	TTAAGTGGTT	14.3868	16746	7958	Weng	other
RORA_1_MA0071.1	0.0184778	20.5613	-	-	CAAACGTAAACAAT	14.8238	10192	5835	Jaspar	RRE
RORA_2_MA0072.1	0.0078681	21.2117	-	-	GTAAACAT	11.9264	6021	4177	Jaspar	RRE
RORA_M208	0.0226829	22.1712	-	-	GGGGGGGGGGCCA	14.2338	8234	5079	Selex	RRE
RREB1_MA0073.1	0.00250293	9.71265	0.00112038	14.2445	CCCCAAACCACCCCCCCCCC	22.2783	117611	10714	Jaspar	other
RUNX1	0.00428469	5.96279	-	-	TATTTCCT	5.42842	10687	6041	Weng	other
RUNX1_MA0002.1	0.00218137	18.9036	-	-	TATTGTGGTTA	11.6957	4580	3454	Jaspar	other
RUNX1_MA0002.2	0.00532063	12.6866	0.0012205	11.0824	GTCTGTGGTTT	10.4014	17732	7942	Jaspar	other
RUNX2_M98	0.00565857	9.97872	-	-	GGCTTCCC	5.04668	11724	6662	Selex	other
RUNX2_M99	0.00168583	5.68545	0.00100476	8.37856	GATTTCTT	6.76758	13721	7206	Selex	other
RXR::RAR_DR5_MA0159.1	0.00132758	15.984	0.00152192	14.0361	GGTTACGTAATT	11.1469	16669	7707	Jaspar	other
RXRA	-	-	0.000576465	5.01337	GACTTCCT	7.32615	40141	10270	Weng	other
RXRA::VDR_MA0074.1	0.000977223	20.5679	-	-	GGGTCATCGGGTTCA	20.4512	7348	4890	Jaspar	other
Rxra_M209	0.00576175	4.56118	0.00293841	15.6869	CTCTGACGTCATCG	15.753	10305	6177	Selex	other
SOX10_M225	0.000941618	18.8562	-	-	TTTGGCGCGAAA	12.4506	6054	4209	Selex	other
SOX18_M227	0.00463046	21.9448	-	-	CTCAAGTTCAAGTTCACC	21.7708	3307	2602	Selex	other
SOX2	-	-	0.00202639	7.18887	AACTAGGGCAAAGGTCA	16.2416	10510	6171	Weng	other
SOX7_M228	0.00541177	16.4884	-	-	GAAACATCTGGA	16.5444	4034	3064	Selex	other
SOX9_M229	0.00367547	16.9935	0.00298228	19.8815	ATTAAATGACACGTCATCTTTCTG	15.9776	3604	2848	Selex	other
SP1	0.00228921	4.60177	0.00138238	8.49029	CCTGAGAATAATC	26	120886	12315	Weng	other
SP1_MA0079.2	0.00253546	0.927221	0.00116551	22.5763	CCCCGCCCCC	11.1289	165243	12356	Jaspar	other
SPDEF_M51	0.00689766	17.1408	0.00539627	20.5471	TTACTAATCCCAC	9.17	7967	5217	Selex	other
SPDEF_M52	0.00758803	21.1293	-	-	AGCAAAC	8.27189	4941	3728	Selex	other
SPDEF_M53	0.00122009	15.925	-	-	CGTTACTAGGCAAC	14.5777	6967	4670	Selex	other
SPI1_M54	-	-	0.00266648	5.1446	AGATTGAGT	10.4485	11398	6697	Selex	other
SPI1_MA0080.2	0.000841043	0.330324	-	-	AGGAAGT	9.64024	9824	5918	Jaspar	other
SPIB_MA0081.1	0.00056766	6.34963	0.00152423	11.5647	AGAGGAA	9.06008	12263	6832	Jaspar	other
SREBF1	0.0128647	19.908	0.0126817	20.9258	CTGAACTTTGACC	13.8181	11144	6405	Weng	SREB
STAT1_MA0137.1	0.0037821	22.2437	0.00165016	5.35749	GGAAAATGAAACTG	18.4309	14590	7229	Jaspar	other
STAT1_MA0137.2	0.000355225	15.4587	-	-	CATTTCCCGGAAACC	13.1188	14155	7219	Jaspar	other
STAT2	0.00214462	20.5764	-	-	GGGGAGGG	12.2928	18424	7995	Weng	other
Sox17_M231	0.00594444	19.7523	-	-	TTTGCACACGGCCC	16.748	2990	2427	Selex	other
Sox17_MA0078.1	0.00215261	8.24627	-	-	TTCATTGTC	10.5018	5118	3742	Jaspar	other
Sox3_M234	0.00898514	6.8326	0.00453181	8.16591	AGAGGAAG	11.013	3701	2921	Selex	other
Spz1_MA0111.1	0.00708946	22.2595	0.00458642	0.68175	AGGGTAACAGC	11.9065	10486	6205	Jaspar	other
Stat3_MA0144.1	0.00385278	17.8319	0.00212635	0.801128	TTCCAGGAAG	13.6007	21902	8275	Jaspar	other
TAL1::TCF3_MA0091.1	-	-	0.000872968	6.96593	CGACCATCTGTT	14.0701	9722	5071	Jaspar	other
TBP	0.000515064	16.9192	0.00349075	10.6682	CAGCCAATGAG	18.519	5747	3826	Weng	other
TBX15_M107	0.00160791	1.0022	-	-	GGCAGGTGCCG	12.9942	5580	3835	Selex	other
TBX20_M111	-	-	0.00582865	20.3816	AAAGTGAAACTG	17.779	9111	5333	Selex	other
TCF12	0.00455935	23.4858	0.00158412	23.8297	GGAATG	10.0581	34837	9338	Weng	other
TCF7L2	0.00360612	9.01354	-	-	TATGTAAGGAGC	13.3846	10183	5895	Weng	other
TEAD1	0.00135493	8.26575	-	-	TCACTGTGACTCA	12.8511	7512	4976	Weng	other
TEAD1_M114	0.00170902	12.4221	0.00311364	12.5394	GGGCGCGG	6.81535	4641	3352	Selex	other
TFAP2A_MA0003.1	0.000787814	22.5868	-	-	GCCCGGGGG	7.81209	44683	10769	Jaspar	other
TFCP2_M37	9.92e-06	17.5241	-	-	CATCCCTTGGGTGTGG	17.9579	5416	3975	Selex	other
THRB_M212	0.00166055	17.1532	0.000721085	0.358811	AATATTCAACAG	15.6009	7992	5145	Selex	other
TLX1::NFIC_MA0119.1	0.000353269	11.2982	6.03e-05	16.9534	TGGCACCATGCCAA	19.6649	25202	8011	Jaspar	other
TP53_MA0106.1	0.00249431	8.707	0.00359638	18.3818	CCGGACATGCCCGGGCATGT	26.2394	11891	6178	Jaspar	other
Tcfap2a_M116	0.00260531	20.2209	0.00126576	19.8558	GAAAAAATC	11.5285	29542	9870	Selex	other
Tcfap2a_M117	0.00513386	7.04444	0.000994404	4.85478	TTTCCCGC	10.7879	25564	9343	Selex	other
Tcfcp2l1_MA0145.1	0.00217073	6.65889	0.00380427	5.11878	CCAGTTCAAACCAG	11.6503	27386	9558	Jaspar	other
Tp53_M214	0.00932672	10.4544	0.00152407	9.81336	TTTCGCGC	13.4874	9474	5406	Selex	other
Tp53_M216	0.00296954	5.31143	-	-	TTTGGCGC	13.0866	5653	3905	Selex	other
UA1	0.00394428	5.96985	0.00507861	7.1981	ATGTGTTTGTTTA	17.9459	11473	5541	Weng	other
UA10	0.00142188	10.06	-	-	CAGGAAGC	12.2851	11642	6308	Weng	other
UA11	0.000663218	9.72301	0.000238426	6.94456	ATGAATAAAT	12.009	11326	6423	Weng	other
UA12	2.05e-06	16.2605	0.00362396	22.4674	GTAAGAGGAAGT	14.45	48371	10673	Weng	other
UA2	0.00626278	11.8633	0.0031364	15.7019	TTCACTT	11.0001	24952	9497	Weng	other
UA3	0.000908083	5.27853	-	-	CACCCCA	11.8908	77817	11685	Weng	other
UA4	0.00485457	19.3319	-	-	GGAAATT	9.00549	11076	6373	Weng	other
UA5	0.00555834	20.4107	0.00140251	3.3837	TGTGGT	11.4967	28335	10015	Weng	other
UA6	0.00330156	19.4084	0.00346006	21.3837	AGACAAGTCC	7.65792	26219	9787	Weng	other
UA7	0.000297562	15.0794	0.00135099	17.8427	GGGTCAAAGGTCA	10.0337	24091	9474	Weng	other
UA8	0.00573446	22.4034	-	-	TGACCTTTGACCC	11.0435	14933	7202	Weng	other
UA9	0.00472419	11.2801	0.00346098	15.6898	TGACCTTTGACCC	13.625	30337	9771	Weng	other
USF	0.00100736	2.85326	0.00608462	6.98774	TGACCTTTGACCC	18.0755	16387	6802	Weng	other
V_ACAAT_B	-	-	0.0037156	9.25637	GAATTTGGCAAA	6.41569	11178	6352	Transfac	other
V_AFP1_Q6	-	-	0.00428102	18.5141	AACCACTTCCTG	10.6924	3402	2639	Transfac	other
V_AHRARNT_01	-	-	0.00527798	19.7264	TTCAGTTTCACTTTC	13.9292	7714	5023	Transfac	other
V_AHRHIF_Q6	0.0062877	5.87895	-	-	GGCGGGGAAATTCCCC	11.8508	13590	6984	Transfac	other
V_AHR_01	0.000709172	3.63568	-	-	CCTTAGCCAATCA	11.4711	15539	7960	Transfac	other
V_AHR_Q5	0.00242484	7.20301	-	-	GGGATCACCCCA	13.1963	10941	6188	Transfac	other
V_AIRE_01	0.00590289	6.05186	-	-	CTTGCGTGCGC	11.3392	4536	3393	Transfac	other
V_AIRE_02	0.0109927	20.98	-	-	AGATAAG	8.22927	4206	3250	Transfac	other
V_ALPHACP1_01	0.00347863	17.2217	0.00125771	18.055	TGGTTAATAATTAACAGT	11.1278	12908	6762	Transfac	other
V_AML2_01	-	-	0.000224413	15.5642	AATTCATAATTATACACA	13.243	4118	3256	Transfac	other
V_AML2_Q3	0.00226304	14.3208	0.00291966	15.3618	GGCGCG	8.31908	16251	7771	Transfac	other
V_AP1FJ_Q2	0.00659575	23.6334	-	-	GTGGGGGCGGC	11.9323	10957	6367	Transfac	other
V_AP1_01	0.000463915	22.4357	-	-	CTGGAACTCAC	11.8832	10298	6051	Transfac	other
V_AP1_Q2_01	0.00259797	6.15678	0.000112195	11.714	ATTGCACAATTT	7.89977	9800	5775	Transfac	other
V_AP1_Q4	0.00690299	22.1	0.00584836	20.9913	CAACTGCCC	6.61709	9804	5884	Transfac	other
V_AP1_Q6	0.00205634	4.70528	-	-	GGTTACGTCAGCGG	11.451	9554	5797	Transfac	other
V_AP2ALPHA_01	0.00186882	22.4642	-	-	TCGCGCCAAAC	11.5168	44683	10769	Transfac	other
V_AP2ALPHA_02	0.00127163	9.31661	-	-	TTCGCGCCAAAC	11.8163	36112	10522	Transfac	other
V_AP2ALPHA_03	0.00461128	10.1229	-	-	TCTGTTCT	8.05199	15477	7771	Transfac	other
V_AP2ALPHA_Q6	8.89e-05	13.2814	0.000376144	2.31602	CCATATAAGGAGATG	14.3015	80520	11609	Transfac	other
V_AP2BETA_Q3	0.00214215	10.7477	0.0017302	9.84198	TGACTCATGGTT	8.59941	103223	12206	Transfac	other
V_AP2GAMMA_01	0.000539146	0.318344	0.000356392	3.42839	ATGACTCAA	7.99318	48577	11064	Transfac	other
V_AP2REP_01	0.00189541	4.46453	0.000940444	4.81933	GCCAGCTGC	9.84902	16287	7858	Transfac	other
V_AP2_Q3	0.00147717	2.72207	0.000143225	20.9026	TGTACCGTTTTCGGTT	15.1073	70646	11627	Transfac	other
V_AP2_Q6	0.00156385	8.4612	0.000339254	8.15771	CCGCGGCAGGTGGCGAAG	12.1361	62926	11289	Transfac	other
V_AP2_Q6_01	0.00125971	11.6337	0.000202843	16.4377	TGATTTGCATA	9.76834	118610	11998	Transfac	other
V_AP4_01	0.00195676	3.85988	-	-	AGGGGGCGGGGCC	10.7449	28489	9856	Transfac	other
V_AP4_Q5	-	-	0.000530423	21.1709	CCCCGCCCCC	10.6708	23942	9014	Transfac	other
V_AP4_Q6_01	0.0033343	13.5654	0.00118226	16.2591	TTGGCGCGAAACGGGC	13.1378	28787	9184	Transfac	other
V_AP4_Q6_02	0.00542717	8.68303	-	-	TTTGGCGCG	11.207	47149	11036	Transfac	other
V_APOLYA_B	0.00311957	20.9138	-	-	GTTTCGCGCC	10.8779	3775	2863	Transfac	other
V_AREB6_01	-	-	0.00267732	8.05178	GGCTATTTTTAG	13.9673	11392	6218	Transfac	other
V_AREB6_02	0.0012312	6.81704	-	-	GCTGGTTTGCGCTGG	12.0812	12446	6602	Transfac	other
V_AREB6_03	0.00277383	8.56284	0.000869752	23.0481	GGGGAGGGTACATTGTGTTCTTGTTCG	20.2752	16035	7442	Transfac	other
V_ARP1_01	0.0044531	13.5167	0.00379844	17.9321	TGAGCACGT	6.53619	16437	7672	Transfac	other
V_ARX_02	0.00765766	21.602	-	-	AGGGTTAATAAC	9.4639	2187	1329	Transfac	other
V_AR_01	0.00395538	8.97246	0.00227101	8.65525	TGACCTCTACTGACCCC	11.9382	7759	4983	Transfac	GR
V_AR_02	0.0124388	6.64743	0.00539407	5.93908	GATGAACTTCCTGACCCGTTT	16.4415	9443	5654	Transfac	GR
V_AR_03	-	-	0.00285257	10.9072	AAAGTCCAA	7.5098	10947	6206	Transfac	GR
V_AR_04	0.00429945	10.6368	-	-	ACTTCCTC	8.81538	8094	5180	Transfac	GR
V_AR_Q6	0.00492504	23.6747	-	-	CACCTGTC	10.7818	11179	6261	Transfac	GR
V_AR_Q6_01	0.00962978	10.0006	0.00909984	9.36544	TAGCCAGACAG	9.99689	14242	6919	Transfac	GR
V_ASCL2_03	0.00378734	16.0894	-	-	CTGTTGCCA	9.2291	40516	9640	Transfac	other
V_ASCL2_04	0.00492503	5.16803	0.00153365	6.28001	TGCGTGCGG	9.57096	85576	11888	Transfac	other
V_ATF2_Q5	0.00013612	1.54552	-	-	CCCGCCCCCGCCCC	14.0181	10607	5723	Transfac	other
V_ATF3_Q6	0.00231997	2.35877	-	-	TGCTGAGTCAT	9.22157	11491	6534	Transfac	other
V_ATF4_Q2	-	-	0.00132672	10.9553	CTGTCACGTGACCA	15.1076	12285	7012	Transfac	other
V_ATF4_Q6	0.011129	8.5404	0.00406523	11.3256	CGGGGG	6.57958	8126	5184	Transfac	other
V_ATF5_01	0.00305605	19.9931	-	-	TTATTTGTGTTGTTTTTTAT	30.9637	17232	7841	Transfac	other
V_ATF_01	-	-	0.00696366	11.047	GAAGTGTTGTTTCAGAC	17.7299	7111	5004	Transfac	CREB
V_BACH2_01	-	-	0.00214868	7.1253	GATTGATGGTTG	11.5019	8493	5485	Transfac	other
V_BARBIE_01	0.00317336	21.1734	-	-	TTATTAATTGGTTATATTGGTTAAAT	14.468	11171	6400	Transfac	other
V_BARHL2_01	0.00285104	5.35109	-	-	CCGCCCTCGGGTGTTTCCGGAGTAG	16.4451	3820	2893	Transfac	other
V_BBX_04	0.00181102	12.6422	3.43e-05	5.92271	CATCTCCTTATATGGCCAT	15.099	3915	2892	Transfac	other
V_BCL6B_04	0.000677367	14.2439	0.00127809	7.42438	ACTGCAATTTTTTGA	7.82905	77942	11762	Transfac	other
V_BCL6_01	0.00234158	13.8615	-	-	AGCAGTTAATAATTAACCTTA	10.6733	9516	5463	Transfac	other
V_BCL6_Q3	0.00830494	18.714	0.00417279	20.0436	TGGGTCATTAGAGTC	11.1167	10230	5945	Transfac	other
V_BCL6_Q3_01	0.000368385	11.3988	-	-	CTCTTTGTTATGA	15.9342	14966	6957	Transfac	other
V_BDP1_01	0.00209063	5.97823	-	-	AACAAT	10.5769	9201	5413	Transfac	other
V_BEL1_B	0.00227398	7.66338	-	-	ACATCAATCATG	7.72411	13992	7353	Transfac	other
V_BEN_01	0.00197072	16.1343	0.00412683	12.5054	AAAGGTGTGAAA	11.8755	18451	8419	Transfac	other
V_BETACATENIN_Q3	-	-	0.00188933	1.8071	GATCAAAGGG	10.0905	9918	5890	Transfac	other
V_BLIMP1_Q6	0.00484506	8.22138	0.000897507	12.4799	GCGCTGTCCGTGGTGCTGA	24.8396	20700	8386	Transfac	other
V_BRN2_01	0.0053419	11.9003	-	-	GGGGCA	4.09255	2936	2329	Transfac	other
V_BSX_01	0.000171981	21.7541	0.000977747	21.4626	TCCCCTGACCTTTGCCCTCTGCC	13.2657	3111	2294	Transfac	other
V_BTEB3_Q5	0.00358215	21.8901	0.00112297	6.12703	TTTGGGTGGTCC	13.9977	36520	10471	Transfac	other
V_CAAT_01	-	-	0.000265382	12.181	GACCACCCAG	13.2811	14763	7094	Transfac	other
V_CAAT_C	0.000999216	12.9254	0.00491812	7.76994	TGCCACTTGA	13.1134	13900	7266	Transfac	other
V_CACBINDINGPROTEIN_Q6	0.000547994	14.2233	-	-	CTCACACCTT	17.4024	72767	11717	Transfac	other
V_CACCCBINDINGFACTOR_Q6	-	-	0.000418875	2.48314	ACCGCCTGAGGGGAT	13.5103	38193	10535	Transfac	other
V_CACD_01	0.00294425	7.92783	0.000298611	12.0887	ACCGCCTGAGGCGGT	16.4146	71877	11612	Transfac	other
V_CAP_01	0.000892497	6.37378	0.00430343	21.103	TAAATCACTGCA	15.2342	14414	7217	Transfac	other
V_CARRXR_Q2	0.00199726	10.9051	0.00122503	3.82267	GAGGAAGTGAAAGTGA	17.6476	13065	6623	Transfac	other
V_CBF_01	0.000501457	23.7766	-	-	GATTTTGCTGACGCGGCTA	10.098	6724	4709	Transfac	other
V_CDPCR3HD_01	0.00739998	17.4421	0.00938519	19.2227	TCTACCGGAAGTGGGT	10.959	2812	2206	Transfac	other
V_CEBPA_01	0.00137978	23.4245	-	-	GATTAATT	9.90649	6161	4332	Transfac	other
V_CEBPB_01	0.00101409	18.456	-	-	TTCCTGCTAA	13.5775	9796	5833	Transfac	other
V_CEBPD_Q6_01	0.00188741	19.965	-	-	TATTGTTATGCAAAT	14.5266	6571	4388	Transfac	other
V_CEBPE_Q6	0.0122619	19.1224	0.000359706	0.0436261	CTTTGTG	7.77334	6529	4405	Transfac	other
V_CEBPG_Q6_01	-	-	0.00209168	10.2988	TGTAAACAAATT	13.0052	7963	5158	Transfac	other
V_CEBP_C	0.00736499	2.04739	0.00151583	3.92854	GGTCAGCAG	13.6974	6548	4438	Transfac	other
V_CEBP_Q2_01	0.00642032	18.7058	-	-	GACCACGTGCTC	17.3948	7826	4919	Transfac	other
V_CETS1_Q6	0.00055395	0.359501	-	-	GGAGTTCA	10.3953	9824	5918	Transfac	other
V_CHREBP_Q6	0.000940452	3.654	0.00175062	12.5662	AACCGGAAGTA	18.3983	10309	5984	Transfac	other
V_CIZ_01	0.00944255	5.86441	0.00265326	6.41548	CCGCTCACCCCAGGG	8.15962	5607	4053	Transfac	other
V_CKROX_Q2	0.00025824	10.4668	0.00237751	13.6267	GTTTCTAGGT	11.6678	122878	12256	Transfac	other
V_CMAF_01	0.011254	21.0948	-	-	GCCCTCCCC	13.5568	9443	5708	Transfac	other
V_CMYC_01	0.00598134	18.8109	0.00285605	19.4126	TTTCTTGTAATTCTTT	6.52663	8424	5381	Transfac	other
V_CMYC_02	-	-	0.00362522	16.0875	TGCTTTCTAGGAAT	19.3358	12389	6739	Transfac	other
V_CNOT3_01	0.00337622	7.20852	0.000590221	6.98572	AGGTGTGAAATTGTCACCT	31.8965	103898	11315	Transfac	other
V_COE1_Q6	0.00215177	7.62321	0.00490425	7.91922	TGGCACCATGCCAA	19.6649	24276	8752	Transfac	other
V_COMP1_01	0.00862631	21.7333	-	-	ATAAGGAAGTA	9.88677	7670	5086	Transfac	other
V_COUPTF2_Q6	0.00655687	20.4569	0.0126237	21.3836	GGTACAGGGTGTTCT	14.1259	24206	8644	Transfac	other
V_COUPTF_Q6	0.004604	19.9003	0.00190182	20.1488	GGGTCATCGGGTTCA	20.4512	51978	11295	Transfac	other
V_COUP_01	0.00386954	18.2893	0.000863139	20.4792	AAAAAGCGGAAGTAGGG	13.3796	22733	8531	Transfac	other
V_CP2_01	-	-	0.00408724	5.41888	AAAAAGAGGAAGTTCCT	16.2223	21948	8872	Transfac	other
V_CP2_02	0.00723192	21.8063	0.00382483	22.0579	CTTCCTG	8.66785	32936	10241	Transfac	other
V_CREBP1_01	0.0187748	11.8128	-	-	TTGACCTTTG	12.9053	2287	1914	Transfac	D-box
V_CREBP1_Q2	0.00355162	9.2599	-	-	CCGCCCCCTCC	13.0639	6422	4675	Transfac	CREB
V_CREB_Q2	0.00679838	6.51246	0.00457536	10.7581	GGAATTTCCCAC	12.2684	7449	5210	Transfac	CREB
V_CREB_Q2_01	-	-	0.00823866	10.0299	GCTGAC	6.2335	10250	5886	Transfac	CREB
V_CREB_Q4_01	0.00224744	6.76966	0.00609311	12.1463	ATAAT	10	8647	4961	Transfac	CREB
V_CREL_Q6	0.00413286	1.13883	0.000197279	5.3481	TATTAGTAATAA	12.7534	12301	6603	Transfac	other
V_CREM_Q6	0.00558246	21.9635	0.00426569	19.1825	CACTAATTAC	11.2259	11601	6348	Transfac	other
V_CTCF_01	-	-	0.00221793	20.8504	TTAGGGTTAGGGTTG	26.5344	67008	11779	Transfac	other
V_CTCF_02	0.00176779	13.4349	0.000761242	16.031	GGGGATTTCC	12.7004	42038	10749	Transfac	other
V_CTF1_01	0.00191933	11.3471	0.00020287	16.9609	CAGCGACC	6.24408	25202	8011	Transfac	other
V_DAX1_01	-	-	0.00658916	13.8044	GAACGTTCTAGAA	21.3451	27375	9411	Transfac	other
V_DBP_Q6_01	0.00463201	15.4199	-	-	TTTAAAAAACAAAGGAAGCA	10.6321	5953	4014	Transfac	other
V_DBX1_01	0.00244636	21.3572	-	-	GAAGTGCAAGGTCACCTTCC	11.2555	6347	3169	Transfac	other
V_DEAF1_01	0.00628956	8.71768	0.00178656	13.5798	CGTTTCCC	8.11606	24486	9144	Transfac	other
V_DEC2_Q2	-	-	0.0056823	3.92461	GGCCGCGCCG	12.5965	11044	6023	Transfac	E-box
V_DEC_Q1	0.0042107	10.0194	0.00127564	10.7615	AATCATTAAAAT	10.2669	13995	7118	Transfac	E-box
V_DELTAEF1_01	0.00205833	10.8457	-	-	GCTGGGCGCTGTCCATGGTGCT	20.0744	10684	6218	Transfac	other
V_DMRT5_01	0.00139791	5.39007	0.00449676	7.40756	TGGCCTT	10.3652	5622	3934	Transfac	other
V_DMRT7_01	0.015796	2.06813	0.016287	4.10593	AGGTCAG	8.34054	6270	4288	Transfac	other
V_DOBOX4_01	0.010738	5.18633	0.0114108	8.41458	AACCCCTTTGTTATGC	13.7008	3420	2758	Transfac	other
V_DR1_Q3	-	-	0.000228014	8.47921	CATTAA	8.48064	30335	9400	Transfac	other
V_DR3_Q4	0.00100995	2.6248	-	-	TTATTTTCGCTTT	12.7455	18386	8318	Transfac	other
V_DR4_Q2	0.00164031	16.4618	0.00498702	20.8329	GGAAAA	9.56476	16285	7748	Transfac	other
V_DUXBL_01	0.00419182	4.423	-	-	CTTTGAA	6.3398	6129	4276	Transfac	other
V_E12_Q6	0.00175506	2.98446	-	-	CTGCTGCTGTGC	11.2607	26130	8985	Transfac	other
V_E2A_Q2	0.00391705	4.36798	0.00275699	5.03454	ATAAAA	9.57653	31393	9691	Transfac	other
V_E2A_Q6_01	0.00359974	16.2008	-	-	CCTCTTCCTTA	14.6083	31752	9589	Transfac	other
V_E2F1_01	0.000872052	21.5342	-	-	ATATTCGCGATTATT	17.1217	5492	4184	Transfac	other
V_E2F1_Q3_01	0.00292699	10.02	0.000320258	10.0174	GGGGCGGGGGG	14.7746	42454	10261	Transfac	other
V_E2F1_Q4	0.0026984	13.0323	-	-	GACCATATAAGGC	14.685	6212	4367	Transfac	other
V_E2F2_03	0.00153803	7.45289	0.00115619	7.30783	AATGCAAAAA	7.33256	22338	7482	Transfac	other
V_E2F2_04	-	-	0.00594345	8.27363	AACAAAGG	11.0881	16045	6955	Transfac	other
V_E2F3_Q6	0.00349281	20.1459	-	-	GATGGGGTATCATTTTT	13.5247	71296	11457	Transfac	other
V_E2F4DP2_01	0.000221411	20.6278	-	-	ACAAGCAATTAAAGAAT	14.3904	6223	4309	Transfac	other
V_E2F4_04	0.00657444	17.39	-	-	AATTAATTAATTAATTC	14.2106	18218	7485	Transfac	other
V_E2F4_Q6	0.00257493	5.35074	0.00203238	3.71674	TAAGCTCGTAAAATTT	14.0685	14713	7385	Transfac	other
V_E2F6_01	0.00678456	22.7088	-	-	AATATACATGTAATATT	13.3814	7802	5268	Transfac	other
V_E2F_Q3	0.00147391	18.7416	-	-	CGTAATTAATTAATTGG	15.475	5305	3711	Transfac	other
V_E2F_Q6_01	0.00333221	3.21605	-	-	TAAAGTCGTAAAATAG	14.6117	10931	6201	Transfac	other
V_E2_Q6_01	0.00170926	18.1581	0.00648569	16.1664	AACAACCAATTAATTC	13.6408	5015	3577	Transfac	other
V_E47_02	0.000611451	8.28758	-	-	TGCGCTAATTAGTGGGA	12.5138	15499	7281	Transfac	other
V_E4BP4_01	0.00189505	10.4373	-	-	CGAGTTAATTAATAATT	13.8958	2514	2056	Transfac	D-box
V_E4F1_Q6_01	0.00339491	22.7091	0.00107588	17.2986	TTGAGGTAATTAGT	12.3832	5019	3864	Transfac	other
V_EAR2_Q2	0.00237953	23.9348	-	-	TTGAGTTAATTACCCT	11.5984	30350	9449	Transfac	other
V_EBF1_01	0.00186135	10.3156	0.00275317	19.0858	CGACCTAATTAGTACTA	9.91874	22022	8632	Transfac	other
V_EBF_Q6	-	-	0.00133321	10.6757	AAAGTAATTAGTGAAT	11.742	20220	8006	Transfac	other
V_EBOX_Q6_01	0.000295166	11.9597	-	-	ACCGGTTGATCACCTGA	9.98907	21522	8395	Transfac	E-box
V_EFC_Q6	-	-	0.00137748	6.66792	AGGGGGATTAGCTGCC	15.1883	5590	4064	Transfac	other
V_EGR1_01	0.00190775	21.7237	-	-	TAATGATGATCACTA	10.2335	25487	9441	Transfac	other
V_EGR1_02	0.00583931	0.536288	0.00205754	22.8645	AATAGGGTATCAATATT	13.6801	30961	10004	Transfac	other
V_EGR1_04	0.00563965	20.3744	0.00444234	21.3224	TATATTGACAGCTGCGT	14.6425	22588	8880	Transfac	other
V_EGR1_06	-	-	0.000986946	0.986062	AGGACGCTGTAAAGGGA	11.868	67342	11330	Transfac	other
V_EGR1_Q6	0.00114472	6.12681	0.00400586	15.9771	GTAACTAATTAACTACT	14.9613	102476	11885	Transfac	other
V_EGR2_Q6	0.00240601	1.17942	-	-	TAAGCCACTTGAAATT	12.7764	30793	9581	Transfac	other
V_EGR_Q6	0.00311442	10.3837	-	-	TTTTAAGTACTTAAATT	13.1719	69477	11826	Transfac	other
V_EHF_06	0.000403871	0.159031	-	-	TAAACTAATTAGCTGAG	14.5219	16781	8047	Transfac	other
V_EKLF_Q5	0.00347689	19.935	0.00367294	6.4436	TCACCCATCAATCATCA	10.1897	40600	10592	Transfac	other
V_ELF2_02	0.000703672	20.0201	-	-	TAAAGTCGTAAAACGT	14.0152	16818	8033	Transfac	other
V_ELF4_04	0.00675961	4.06029	0.00260443	9.81663	TGAGGGGGATTAACTAT	15.3812	14078	5731	Transfac	other
V_ELK1_01	0.00594888	15.2169	0.00409533	14.709	GATTATTAATTAACTTG	13.7341	16325	8180	Transfac	other
V_ELK1_02	0.00469718	21.5239	-	-	TGCCACTAATTAGTGTA	12.9329	19685	8528	Transfac	other
V_ELK1_03	0.000761725	19.7412	-	-	TTAACCACTTGAAAATT	13.5677	11475	6479	Transfac	other
V_ELK1_05	0.00577007	19.4031	-	-	ATAAATGACACCTATCA	13.3437	11992	6431	Transfac	other
V_ELK1_06	8.38e-05	9.41327	-	-	AATGCAATAAAATTTAT	11.6839	16261	7509	Transfac	other
V_EOMES_04	0.00306344	19.1201	0.00255787	10.5223	AAGAGGGATTAATTATC	15.1138	15152	7764	Transfac	other
V_ER81_01	0.00066063	6.25609	-	-	AAGACGCTGTAAAGCGA	12.0004	14055	7067	Transfac	other
V_ER81_02	0.00435891	8.08302	-	-	TGAACTAATTAGCCCAC	13.604	18004	7878	Transfac	other
V_ERALPHA_01	0.00178232	3.62178	-	-	CACCGCTAATTAGCGTT	15.807	11151	6249	Transfac	other
V_ERALPHA_Q6_01	-	-	0.00133821	18.9923	TGTAGGGATTAATTGTC	13.5986	13537	7079	Transfac	other
V_ERBETA_Q5	0.00296715	0.109491	0.00517056	4.4864	GGGGTAATTAGCTCTG	10.9141	22082	8566	Transfac	other
V_ERF_01	0.00189314	11.0897	-	-	TGCACTAATTAGCGCAC	13.6234	13546	6804	Transfac	other
V_ERR1_Q2	-	-	0.00249516	23.568	GTAGTAATTAATGCAA	11.9041	14305	7021	Transfac	other
V_ERR1_Q2_01	0.00405375	14.4346	-	-	ACGTTAATTAACCCAG	11.7019	19461	8043	Transfac	other
V_ERR1_Q3	0.00212361	13.7109	-	-	AATAGGGTATCAATTAT	15.1559	14221	7108	Transfac	other
V_ERR3_Q2_01	0.00509565	10.5605	-	-	TGCATTAATTAATGCGA	12.3274	12116	6465	Transfac	other
V_ER_Q6	0.00156485	5.54972	-	-	AAGGTAATTAGCTCAT	13.1419	13961	7079	Transfac	other
V_ER_Q6_02	0.0065297	8.9772	-	-	TGAACCGGATTAATGTA	12.9889	18504	8119	Transfac	other
V_ESE1_02	-	-	9.72e-05	16.5441	TAAATACATGTAAAATT	13.792	19196	8576	Transfac	other
V_ESE1_Q3	-	-	0.00020035	16.5097	CAAATTAATTAATAAAA	11.1385	19196	8576	Transfac	other
V_ESR1_01	0.00178074	19.4875	0.000709721	12.0542	AACTAGCTGTCAATAC	15.8861	39952	10059	Transfac	other
V_ESR2_01	0.000550676	10.9399	0.000180895	9.89911	AGTTATTAATGAGGTC	15.0412	22349	8291	Transfac	other
V_ESRRA_04	0.00264805	17.8522	0.00378994	18.0947	AATATACATGTAAAACA	11.9055	18992	8191	Transfac	other
V_ETF_Q6	0.000477796	18.3382	0.00188799	12.4899	TGCAACTAATTAATTC	11.9516	81598	11415	Transfac	other
V_ETS1_B	0.00615217	6.04231	0.002806	6.32279	ACAAGCAATTAAAGAAT	13.9499	25708	9579	Transfac	other
V_ETS2_Q6	-	-	0.00327564	6.00155	TAAGCCACTTGAATTT	14.6799	26803	9819	Transfac	other
V_ETS_B	-	-	0.00559929	5.06084	CGCGTTAATTAATTGTG	12.5901	16314	7848	Transfac	other
V_ETS_Q6	0.00115825	5.25444	-	-	CGCATTAATTAATTACC	13.4895	27796	9795	Transfac	other
V_ETV7_01	0.00217897	22.3016	-	-	TAATTAATTAATAACTT	11.5177	19582	8711	Transfac	other
V_EVI1_01	0.00707854	11.1693	-	-	TAAACTAATTAGCTTTG	13.0947	5363	3558	Transfac	other
V_EVI1_04	0.0092087	22.3094	-	-	CGCGTTAATTAATTACC	12.8263	8457	4681	Transfac	other
V_EVI1_05	-	-	0.00264485	8.68781	AGCTGTTAACTAGCCGT	13.643	3845	2836	Transfac	other
V_EWSR1FLI1_01	0.000583464	22.9742	0.000156762	19.9377	AAAGCTCGTAAAATTT	14.6728	81582	11281	Transfac	other
V_FAC1_01	0.00103276	0.463874	0.0012386	2.92332	TAAGTAATTAGTTATA	12.0195	14812	6382	Transfac	other
V_FEV_01	-	-	0.000379871	19.5931	TAATTAATTAATGGCTA	12.8236	15019	7780	Transfac	other
V_FKHL5_Q3	0.00296792	6.64321	0.00298812	3.27884	AATGGGGTATCACTTTT	15.0714	5860	4021	Transfac	other
V_FKLF_Q5	0.00017659	11.9541	-	-	TAAGGTCGTAAAATCCT	14.933	87280	11743	Transfac	other
V_FLI1_02	-	-	0.00505238	15.9006	CGTTGGGGATTAGCCT	14.61	14417	7383	Transfac	other
V_FLI1_Q6	0.00629596	4.34426	-	-	TTAGGTCGTAAAATTTC	14.9798	22800	9258	Transfac	other
V_FOXA2_02	0.00340826	0.507057	-	-	AAGGTAATTAGCTCAT	12.1989	6278	4264	Transfac	FOX
V_FOXD3_01	1.65e-05	19.8172	-	-	ACCCCTAATTAGCGGTG	13.7794	14229	5701	Transfac	FOX
V_FOXJ1_03	0.00170695	9.84579	-	-	CGCGCTAATTAGGTATC	10.9101	10419	5435	Transfac	FOX
V_FOXJ2_02	0.00148794	22.0167	-	-	CAGCATTAATTAGTGG	13.0541	3061	2391	Transfac	FOX
V_FOXJ3_06	0.00759019	3.8349	0.0113916	4.14684	AAAAGCGGATTATTG	14.2919	10263	5586	Transfac	FOX
V_FOXK1_03	0.00182309	8.50974	-	-	AAAAACCAATTAAGAA	15.5012	7972	4943	Transfac	FOX
V_FOXK1_04	0.00598157	9.00423	0.00850673	5.16416	TGAAGGGATTAATCATC	12.9849	7917	4252	Transfac	FOX
V_FOXL1_02	0.00133394	15.2727	0.00149412	22.1472	TAAGCTAATTAGCTGTA	12.4583	13007	5823	Transfac	FOX
V_FOXO1_02	0.00198183	5.04346	0.000235237	6.99296	CGCATTAATTAATTGGC	13.6327	7494	4789	Transfac	FOX
V_FOXO1_03	0.00044972	23.1079	-	-	CGAATTAATTAATTATT	12.7473	4141	3149	Transfac	FOX
V_FOXO1_04	0.00681005	8.70576	0.00513327	9.31224	TGCACTAATTAGTGGAT	12.9953	4834	3529	Transfac	FOX
V_FOXO1_Q5	0.00538473	3.22381	0.0145324	5.05634	GAAAACTAGTTAACATC	12.8668	17895	7098	Transfac	FOX
V_FOXO3A_Q1	0.0113353	8.20537	0.0093455	8.00096	CTTTAAGTACTTAATG	13.1908	10652	5524	Transfac	FOX
V_FOXO3_02	0.000253458	7.54539	0.00553297	5.10891	AAAGACCTGTCAATCC	15.6549	8383	5233	Transfac	FOX
V_FOXO4_01	0.0110332	3.88285	0.0166407	7.34079	TATTGGTAATTACCTT	10.6626	10040	5771	Transfac	FOX
V_FOXO4_02	-	-	0.00441432	4.8987	ACCACTAATTAGTGGAC	13.4366	9535	5439	Transfac	FOX
V_FOXP1_01	0.000588254	10.5628	0.00226291	14.9804	AAACATAATGAGGTTGC	15.6993	53423	7346	Transfac	FOX
V_FOXP3_01	-	-	0.00240706	6.97794	GGAAGGGATTAATTATC	14.7209	11637	5509	Transfac	FOX
V_FOXP3_Q4	0.00391925	15.4756	-	-	TAGGTAATAAAATTCA	11.6647	6653	4630	Transfac	FOX
V_FOX_Q2	0.000662036	8.93841	-	-	GATTAATTAATTAAGTC	13.0468	12689	5811	Transfac	FOX
V_FPM315_01	0.000911689	0.5712	0.00146398	9.52985	TGAGGGGGATTAACTAT	14.8311	81265	11894	Transfac	other
V_FRA1_Q5	0.000879807	20.2612	-	-	AACCCAATAAAATTCG	12.786	8222	5097	Transfac	other
V_FRA1_Q6	-	-	4.98e-05	22.3111	GGGATAATTACTTCAG	11.5012	10854	6137	Transfac	other
V_FREAC2_01	0.00272787	1.46619	0.00715449	1.99075	AGTAATTAATTACTTC	13.7859	6198	4334	Transfac	other
V_FREAC3_01	0.00195306	3.45123	0.00398393	5.2893	GATAATTAATTACTTTG	12.4533	6608	4418	Transfac	other
V_FREAC4_01	-	-	0.0013708	17.3895	GTAATTAATTAAATAAT	15.7396	8348	5275	Transfac	other
V_FXRIR1_Q6	0.00395002	9.61006	-	-	AATTAATTAATTAATTC	13.7814	7718	5079	Transfac	other
V_FXR_Q2	-	-	0.00420012	17.9331	ATCCATTAATTAATTGA	13.9493	5842	4054	Transfac	other
V_GABPAGABPB_Q6	0.00148646	15.8367	-	-	GTTAATTAATTAGTTTG	13.7538	27328	9949	Transfac	other
V_GABPA_04	0.00328759	3.08426	0.00422979	7.71736	TAGAGGGATTAAATTTC	15.5709	60982	11362	Transfac	other
V_GABPBETA_Q3	0.00254328	22.4529	-	-	CATAACCACTTAACAAC	13.2132	28411	10048	Transfac	other
V_GADP_01	0.00787448	18.9937	-	-	TTAGAGGGATTAACAAT	14.2397	29614	10019	Transfac	other
V_GATA1_01	0.00292237	15.1258	0.00125556	15.697	TCGCTATAATTACCGAC	12.5108	8544	5510	Transfac	other
V_GATA1_02	0.00835536	20.9622	-	-	CTGAGCTAATTACCGT	14.0837	3837	2903	Transfac	other
V_GATA1_06	-	-	0.00087538	19.6892	GCCACGCCCAGC	13.1135	4285	3254	Transfac	other
V_GATA2_01	0.00477172	7.81246	-	-	AAAAACAAAGGA	9.93683	7021	4823	Transfac	other
V_GATA2_02	-	-	0.00334715	7.36027	CTTCCTTATCTCT	11.262	4412	3263	Transfac	other
V_GATA2_03	0.00395922	7.43392	-	-	CCAGTTTGAACCGGTTT	13.2482	4776	3417	Transfac	other
V_GATA3_01	-	-	0.00127449	19.0662	CCTTTGTTTTGTT	10.6511	5728	4148	Transfac	other
V_GATA3_03	-	-	0.00422117	17.5307	CTGGGTGGTCT	13.8066	3816	2954	Transfac	other
V_GATA3_05	0.00417682	18.5897	-	-	TGGGGGAGGGG	15.9229	2647	2033	Transfac	other
V_GATA6_05	-	-	8.51e-05	4.39732	GGACATGTCCGGACATGTCC	21.595	7973	4129	Transfac	other
V_GCM1_04	0.0118943	22.0296	0.00405298	20.2113	TTCCGAGAAGACCA	14.9246	10327	6126	Transfac	other
V_GCMA_Q4	0.00473979	12.0174	-	-	GGCACTTGC	9.69704	9598	5744	Transfac	other
V_GCNF_01	-	-	0.000788993	16.7612	GCAGCCATTA	17.9956	13132	6487	Transfac	other
V_GCNF_Q3	0.000915435	9.01737	-	-	GCCATTA	11.2672	11805	6439	Transfac	other
V_GC_01	0.0027004	11.4291	0.00335881	19.6419	GACCACCCACG	16.0738	107956	12185	Transfac	other
V_GEN_INI2_B	0.000733288	18.9098	0.000601524	16.8366	GACCACCCAAG	15.8075	9226	5613	Transfac	other
V_GEN_INI3_B	0.00062284	18.9071	0.000532225	16.8365	GACCACCCACG	14.419	9226	5613	Transfac	other
V_GEN_INI_B	0.000474794	18.9054	0.000329612	16.8364	CCTTTGATG	8.47281	9226	5613	Transfac	other
V_GFI1B_01	0.00555738	19.5997	0.00394039	22.6925	TCAGCAG	8.24575	6014	4225	Transfac	other
V_GFI1_01	0.00288726	16.7816	0.00547921	18.4224	TTAATC	8.034	7345	4777	Transfac	other
V_GFI1_Q6	0.00188784	23.3078	-	-	GAGGTGGGGCGTTG	12.7684	7557	4961	Transfac	other
V_GKLF_02	0.00393976	22.7682	0.000853157	4.90175	TTTCCAC	9.52989	87617	11960	Transfac	other
V_GKLF_Q4	0.00079352	19.0333	0.00304415	23.4933	TAAGGGATTAGAT	11.8696	50403	11046	Transfac	other
V_GLI1_01	-	-	0.0024297	6.86809	GGGGCAGTG	6.81697	14918	7492	Transfac	other
V_GLI1_Q2	0.00244874	14.4144	0.00676693	20.3681	TGACCTA	13	22043	8709	Transfac	other
V_GLI3_01	0.00361756	7.60279	0.00337496	7.61494	GTTGAGGTCAG	9.63243	24731	9170	Transfac	other
V_GLI3_02	1.4e-05	8.98099	0.00226934	3.88273	CCTGACCTTTG	13.7708	16341	7786	Transfac	other
V_GLI3_Q5_01	0.000734207	16.3792	0.00288909	19.2347	TGACCTTTGCCCTT	13.919	33238	10055	Transfac	other
V_GLIS2_03	0.0017963	0.681279	0.00536854	8.42341	TGGGGAG	10.2148	14548	7003	Transfac	other
V_GM397_03	0.00071353	14.5613	-	-	CACTATGAAAG	11.966	10424	4723	Transfac	other
V_GM497_04	0.000624491	19.1583	0.00224811	2.39829	TGCGCATGCGC	15.6427	53479	8639	Transfac	other
V_GMEB1_04	-	-	0.00158786	5.98256	AAGATGGCTGCC	11.2792	5027	3723	Transfac	other
V_GRE_C	0.00163703	9.9733	0.0016161	7.64682	GATAGCATGTGCTACC	17.4776	12181	6478	Transfac	GR
V_GR_Q6	0.00805652	11.6008	0.000708133	15.7792	TTCCATGGAAA	12.92	13583	6755	Transfac	GR
V_GR_Q6_01	0.00559763	22.9358	0.0041499	1.51056	ACCGGAAGT	11.6448	10840	5986	Transfac	GR
V_GR_Q6_02	0.002488	0.676935	0.00577551	7.24282	AACCACAA	9.59309	17461	7630	Transfac	GR
V_HBP1_03	0.0013991	11.3138	0.00318746	18.0164	GGGCGGGAC	14.1328	5248	3435	Transfac	other
V_HBP1_04	0.00134152	6.23435	-	-	GGATTCGAACCC	11.2712	8040	5182	Transfac	other
V_HDX_01	-	-	0.0108968	22.9156	TCAGGAGTTCGAGACC	15.763	4598	3434	Transfac	other
V_HEB_Q6	-	-	0.000961509	12.2492	AGGTCACAGTGACCT	13.6477	29853	9591	Transfac	other
V_HEN1_01	0.00476487	13.5817	0.000507471	15.6107	AAGGGTGCACCCAT	12.9632	19381	8270	Transfac	other
V_HEN2_Q2	0.000380445	3.11333	-	-	CATCTG	8.64587	11524	6374	Transfac	other
V_HES1_Q2	0.00431511	16.3263	0.00142463	18.0125	CCACACCA	9.46274	20342	8717	Transfac	other
V_HES1_Q6	-	-	0.00808025	13.5326	CCCTCCCCCA	12.675	19505	8557	Transfac	other
V_HFH3_01	0.00207497	21.5775	0.000435245	11.7569	TGACGTCACCG	11.2356	15340	6192	Transfac	other
V_HFH4_01	0.0021427	12.8093	-	-	CCCAACTGGCG	7.89913	13290	5645	Transfac	other
V_HFH8_01	0.00449418	8.37507	-	-	GCCCCTT	6.37171	12085	5288	Transfac	other
V_HIC1_02	0.000247222	11.2535	0.00034127	19.2114	TTCCGGGAAA	10.2591	61981	11361	Transfac	other
V_HIC1_03	0.00337309	17.1999	0.00527586	18.7516	GACACTAATCT	11.9188	48461	11157	Transfac	other
V_HIC1_06	0.00203762	4.76835	0.00124724	7.10185	ACTCATAAAA	11.903	11424	6330	Transfac	other
V_HIF1AARNT_01	-	-	0.00182475	7.38805	CCTCCTT	7.96395	7582	5038	Transfac	E-box
V_HIF1_Q3	0.00251197	18.4737	0.000193712	9.90225	GGGGTGGGCG	11.5535	12639	6648	Transfac	other
V_HIF1_Q5	-	-	0.0029645	12.5195	CCGTGACCTTGGAGA	13.2538	9937	5770	Transfac	other
V_HMEF2_Q6	0.0078143	7.0617	-	-	AACCACAA	8.64623	4548	3275	Transfac	other
V_HMX1_01	0.00778283	3.7756	0.00487633	3.90577	CGCTGACGTCAT	9.43445	9043	5722	Transfac	other
V_HMX1_02	0.00749356	20.1568	-	-	ATTACGTCAGC	10.3505	3322	2721	Transfac	other
V_HNF1B_04	0.00924016	18.5794	0.00692133	21.1979	GATTGCGAAATG	9.9907	5068	3470	Transfac	other
V_HNF1_C	0.00242108	18.9147	-	-	TTATGCAA	7.50413	5905	3683	Transfac	other
V_HNF1_Q6	0.00219725	21.1957	-	-	GCGGGGGCGG	11.8459	6251	3831	Transfac	other
V_HNF1_Q6_01	0.00258588	20.4634	0.0100291	23.4463	CCACACCCTG	13.4078	6169	4030	Transfac	other
V_HNF3ALPHA_Q6	0.00279983	21.3977	-	-	GTCAGAGTGACCCAG	12.7164	16757	6661	Transfac	other
V_HNF3B_01	-	-	0.00448995	19.9574	GATAAGC	7.83305	10839	5477	Transfac	other
V_HNF3B_Q6	0.00974625	6.87396	0.00393245	9.82927	AGATAA	8.19665	14860	6475	Transfac	other
V_HNF3G_Q4	0.000699711	4.42467	0.00916382	7.49469	TTGTTA	4.56412	14879	6504	Transfac	other
V_HNF3_Q6	-	-	0.00358731	18.8385	CACTTTCACTTTCC	11.4267	18379	6967	Transfac	other
V_HNF3_Q6_01	0.00692713	2.00893	0.00660298	3.04564	GGGAAAGTGAAAGTGA	13.4492	18725	7193	Transfac	other
V_HNF4ALPHA_Q6	0.000886876	1.31847	-	-	GAAAGTA	10.5807	11996	6564	Transfac	other
V_HNF4A_02	0.00281121	21.5199	0.00208124	20.8873	AAGTGAA	12.6079	10997	6152	Transfac	other
V_HNF4A_03	0.000225391	2.2241	0.00202412	7.38865	GGAAAA	9.64695	29920	9452	Transfac	other
V_HNF4A_04	0.00526594	6.40691	-	-	GGACAGACAGACT	9.18998	14445	7191	Transfac	other
V_HNF4A_Q6_01	0.00204675	2.01479	0.00280484	2.90562	TGTCTGC	7.9262	27752	9178	Transfac	other
V_HNF4DR1_Q3	0.00334024	7.05817	-	-	ACATTTCTAGGAA	12.9047	24890	8791	Transfac	other
V_HNF4_01_B	0.00487763	18.4412	0.00324404	20.5075	TTGTGCAATC	7.18152	23732	8744	Transfac	other
V_HNF4_Q6	0.00912727	20.0492	0.00702165	21.3083	ATTGATTGACAGGG	13.9041	15858	7449	Transfac	other
V_HNF6_Q6	0.00181509	20.8094	0.00790689	1.57692	TGCGTGGGCGT	14.6135	4803	3361	Transfac	other
V_HOXA10_01	0.00183085	19.3836	-	-	CCCGGAAGTA	10.4507	3219	2531	Transfac	other
V_HOXA13_03	-	-	0.000396223	6.7042	ACCGGAAGTA	11.2608	1961	1708	Transfac	other
V_HOXA3_02	0.00547203	19.7327	-	-	ACCGGAAGTG	10.6882	2252	1528	Transfac	other
V_HOXA7_01	-	-	0.00817501	5.35936	ACCGGAAGTG	9.8164	3810	3001	Transfac	other
V_HOXA7_03	0.00150438	22.056	-	-	CCCGGAAGTG	8.60734	2031	1536	Transfac	other
V_HOXB13_01	0.000124265	11.9877	-	-	CAAGGTCA	11.2998	4654	3414	Transfac	other
V_HOXB8_01	-	-	0.000899492	19.3384	GGCACGCGCC	10.1373	2557	2109	Transfac	other
V_HOXB9_01	0.00502807	10.4408	0.00422715	8.53987	GCACGT	7.99628	4342	3351	Transfac	other
V_HOXC13_01	0.00745143	0.986942	-	-	GGCCAAAGTTCAATT	10.5301	2269	1955	Transfac	other
V_HOXD9_Q2	6.48e-05	21.5799	-	-	ATCAAAGGGC	11.445	3530	2790	Transfac	other
V_HP1SITEFACTOR_Q6	0.0032076	20.0439	0.00132238	12.5917	GAGCACTTGAGTGC	7.53057	5763	4013	Transfac	other
V_HSF1_Q6	0.0119338	16.8612	0.00710218	18.2256	ACCGGAAGTG	10.253	11599	6735	Transfac	HSF
V_HSF1_Q6_01	0.00360284	11.3831	0.00307314	12.5388	ACCGGAAGTG	10.4252	12113	6652	Transfac	HSF
V_HSF_Q6	-	-	0.00515631	20.7878	AGCGGAAGTA	7.78012	12701	7033	Transfac	HSF
V_HTF4_Q2	0.00164298	18.4116	-	-	AGCGGAAGTA	9.03498	22602	8621	Transfac	other
V_ICSBP_Q6	0.00734599	3.64086	0.00908044	4.911	GCCGCCATTTTG	16.3066	9755	5777	Transfac	other
V_IK1_01	0.00378222	14.487	-	-	GATGACGTCAT	14.6267	10103	6059	Transfac	other
V_IK2_01	-	-	0.00387292	6.42665	AACACACAT	8.72284	10542	6251	Transfac	other
V_IK3_01	0.0102806	11.7986	-	-	TTGGCA	6.00073	7618	5080	Transfac	other
V_IK_Q5	-	-	0.000974588	16.7365	GTAATTAC	10.8498	40227	10740	Transfac	other
V_INSM1_01	0.00261203	23.8755	-	-	CCCGGAAATA	10.0815	25232	9218	Transfac	other
V_IPF1_05	0.010478	16.5203	-	-	ACCGGAAGTG	11.3512	4420	3230	Transfac	other
V_IRF2_01	0.0100797	21.1208	0.00681757	20.8951	ACCGGAAGTA	10.8582	8725	5377	Transfac	other
V_IRF2_Q6	0.000780247	10.9575	3.24e-05	17.7051	CCCGGAAGTG	8.60734	16393	7381	Transfac	other
V_IRF3_05	-	-	0.00110292	18.1496	CCCGGAAACG	9.07351	8953	5602	Transfac	other
V_IRF3_06	0.00818354	18.1573	0.000152204	20.013	ACCGGAAGTA	10.7021	16349	7883	Transfac	other
V_IRF3_Q3	0.000357569	1.442	0.00169042	4.29577	ACCGGAAGTA	12.0862	11965	6691	Transfac	other
V_IRF4_04	-	-	0.00756927	10.7695	ACCGGATGTA	10.236	7264	5030	Transfac	other
V_IRF4_Q6	0.00769027	19.8468	-	-	AGAGGAAGTG	9.00233	3668	2865	Transfac	other
V_IRF6_04	0.00210968	15.7497	-	-	CTAAGTG	11.943	14430	7567	Transfac	other
V_IRF7_01	0.00514863	15.6226	0.00157306	14.1475	ATAATGG	9.23782	7021	4805	Transfac	other
V_IRF7_Q3_01	0.00304651	14.7767	0.00224023	23.344	TGTGGT	9.5564	16023	7477	Transfac	other
V_IRF8_Q6	0.00111951	19.2264	-	-	CTTTCTAGAA	10.548	5431	3852	Transfac	other
V_IRF_Q6	0.00910575	11.8602	0.0056775	15.1521	TTTATT	8.72932	16961	7457	Transfac	other
V_IRF_Q6_01	-	-	0.00147644	19.3323	TTTATA	7.45223	15588	7185	Transfac	other
V_IRX2_01	0.00662668	20.7404	-	-	GGCCACCTGCTGG	10.8244	3370	2089	Transfac	other
V_IRX3_01	-	-	0.00638122	3.49389	GGCGGGG	9.89205	3007	1856	Transfac	other
V_IRX5_01	0.00591148	22.8476	-	-	CCCACACC	7.98046	3375	1992	Transfac	other
V_ISGF4G_04	-	-	0.00160528	2.82763	TGAGTCAG	9.7282	7019	4730	Transfac	other
V_ISL2_05	-	-	0.00265023	18.6914	CAGCTG	10.2664	3289	2659	Transfac	other
V_JUNDM2_04	0.00350953	22.3213	-	-	CAGCCAATCAGCGC	15.818	7354	3779	Transfac	other
V_K2B_01	-	-	0.000978402	9.67771	CACTTGA	7.9731	2685	1717	Transfac	other
V_KAISO_01	0.00382547	17.0374	0.00987945	19.8491	AAAGGTCAAA	9.62743	15679	7585	Transfac	other
V_KLF15_Q2	-	-	0.00219551	12.2252	TCAATA	10.5561	85618	11582	Transfac	other
V_KLF3_Q3	0.00287579	17.4276	0.00192218	22.3201	ATATGCAAATC	14.3215	27616	9502	Transfac	other
V_KLF7_03	0.00245808	19.7259	-	-	TGTAATCCCA	9.97658	85031	11864	Transfac	other
V_KROX_Q6	0.0047944	4.83838	0.0064601	5.29618	TACAATG	6.83474	108390	12139	Transfac	other
V_LBP1_Q6	0.00119637	14.7301	0.00238298	15.4396	TTCTAGGAAA	10.5771	33877	8868	Transfac	other
V_LBP9_01	0.00201342	0.483312	0.000598442	16.8912	GGTTAATAATTACC	15.5482	24301	8796	Transfac	other
V_LDSPOLYA_B	0.00339882	8.87838	0.000603432	1.95998	AGGCCAAAGGTCA	9.61742	16524	7530	Transfac	other
V_LEF1TCF1_Q4	-	-	0.00247452	8.49241	TGGGGGTTC	7.46607	9722	5765	Transfac	other
V_LEF1_04	0.00078659	18.7646	-	-	CCTTTGTTATGCAAA	12.9513	7559	4891	Transfac	other
V_LEF1_Q2_01	0.00179073	6.8173	-	-	GGAAGGAAGGAAGGAAGG	32.8715	9028	5530	Transfac	other
V_LFA1_Q6	0.00456948	22.1899	-	-	GTAGGGCAAAGGTCA	11.6631	20584	8586	Transfac	other
V_LHX61_01	0.00164501	7.73122	-	-	CACTAATT	8.75889	2377	1688	Transfac	other
V_LMAF_Q2	0.003622	14.383	-	-	TGACTCA	9.19332	19469	8239	Transfac	other
V_LMO2COM_01	-	-	1.77e-05	21.1623	CCCCGCCCCC	11.1289	28250	9463	Transfac	other
V_LRF_Q2	0.00463422	2.83046	-	-	CTCAGCAGCTGCTCCTG	11.2174	23163	8663	Transfac	other
V_LRH1_Q5	0.00179808	21.9989	-	-	ACGATGACGTCATCGA	14.6562	20748	8456	Transfac	other
V_LRH1_Q5_01	0.00466007	3.72606	-	-	TAATTCAATGAAGTG	10.6111	21798	8461	Transfac	other
V_LTF_Q6	-	-	0.00614516	9.71375	TCTTTCGAGGAATTTG	11.7961	17282	8104	Transfac	other
V_LUN1_01	0.00143106	21.9119	-	-	ATAAAGGCGCGCGAT	11.5565	12628	6923	Transfac	other
V_LXRBRXRA_Q5_01	-	-	0.000899872	23.6653	TCCGCCCCCGCATT	14.325	14434	7180	Transfac	other
V_LXRDR4_Q3	0.00839622	21.8357	0.00451082	22.6982	AGGACCCGGAAGTAA	11.4429	11210	6537	Transfac	other
V_LXR_Q3	-	-	0.00157082	19.6184	TAAAAGGTGTGAAAATT	13.796	14809	7553	Transfac	other
V_LXR_Q6	0.00750319	6.63455	0.00323046	0.0318378	TATTCAAGGTCATGCGA	13.2462	14215	7085	Transfac	other
V_LYF1_01	0.00226464	18.399	0.00474836	22.773	AAAAAGTAAACAAAGAC	13.5637	20644	8615	Transfac	other
V_MAFA_Q5	-	-	0.00285398	2.67048	AAAATGTAAACAAACAG	15.2681	20500	8541	Transfac	other
V_MAFK_03	-	-	0.00391693	22.878	TCGTACCCGCATCATT	12.2463	5182	3731	Transfac	other
V_MAF_Q6_01	0.000943919	8.60522	-	-	ACTATGAATGAATGAT	13.3842	17307	7597	Transfac	other
V_MATH1_Q2	0.00208934	18.8145	-	-	ACTATGCCAACCTACC	13.5083	33015	9115	Transfac	other
V_MAX_04	0.00403037	11.1202	0.00237091	10.8792	ATTTACGACAAATAGC	13.6997	10559	6359	Transfac	E-box
V_MAX_Q6	-	-	0.0035614	22.5421	GAGAACCGAAACTG	10.1362	18282	7557	Transfac	E-box
V_MAZR_01	0.00134143	7.37219	0.00231894	7.43966	CGTATCGAAACCAAA	13.0236	60962	11330	Transfac	other
V_MAZ_Q6	0.00471195	18.2444	0.0068807	17.7329	ATAAACCGAAACCAA	13.7348	85962	11962	Transfac	other
V_MAZ_Q6_01	0.00320468	9.11884	0.00134143	9.15082	CTGATCGAAACCAAAGT	12.3802	148771	12110	Transfac	other
V_MEF2A_05	-	-	0.00175812	8.84084	TCGACCCCGCCCCTAT	13.6571	3793	2840	Transfac	other
V_MEF2A_Q6	0.00541234	7.27401	0.00107585	6.10201	GATCCCTTTGATCTATC	14.209	4730	3332	Transfac	other
V_MEF2_02	-	-	0.00413199	5.98733	ATGGAAACCGTTATTTT	11.5195	3670	2805	Transfac	other
V_MEF2_03	-	-	0.00215528	8.48386	TTGAAAACCGTTAATTT	11.9459	3629	2639	Transfac	other
V_MEF2_04	0.00176514	19.0908	-	-	GAAGAACAGGTGTCCG	10.9089	5008	3645	Transfac	other
V_MEF3_B	0.0047854	16.647	0.00207362	10.0116	TCTCAAAGGTCACGAG	13.0815	13265	7016	Transfac	other
V_MEIS1AHOXA9_01	0.00936896	20.0496	-	-	TTTTACAGTAGCAAAA	13.5903	5060	3737	Transfac	other
V_MEIS1_01	0.00275664	15.6239	0.00121763	20.9061	TTGGGGGCGCCCCTAG	11.4222	12752	6731	Transfac	other
V_MEIS1_02	0.0052162	8.09127	0.000274644	13.1707	TCTCAAAGGTCACCTG	13.6365	7534	4852	Transfac	other
V_MEQCJUN_02	0.00297847	22.5307	-	-	TACCATAGCAACGGT	14.8618	8740	4864	Transfac	other
V_MEQ_01	0.00387782	6.55366	0.00199007	0.718605	CCGCATAGCAACGGA	13.472	17544	7354	Transfac	other
V_MINI19_B	0.000658587	9.49258	-	-	CAAATCCAGACATCAGA	11.0194	46756	11168	Transfac	other
V_MINI20_B	0.00239257	7.86679	0.00301138	11.131	ATAAGAACAAAGGACTA	12.8265	43569	11006	Transfac	other
V_MOVOB_01	-	-	0.00111535	11.551	TGGTGAACAATAGATTT	10.6222	52944	9878	Transfac	other
V_MSX1_01	0.00346888	11.9055	-	-	ATTGAACAATGGAATT	10.7463	2941	2487	Transfac	other
V_MSX2_Q3	0.00178738	6.66376	-	-	ATTTTACGGAAAAT	9.54729	5713	4068	Transfac	other
V_MSX3_01	0.0110331	6.92094	-	-	GGTCCCGCCCCCTTCTC	14.3899	3222	2558	Transfac	other
V_MTF1_01	0.0057889	23.1767	-	-	TCTTTATATATAAATA	10.1117	9555	5877	Transfac	other
V_MTF1_02	0.00092436	16.8233	-	-	ACTTAGTTAACTAAAAA	10.8391	13705	6815	Transfac	other
V_MTF1_05	0.00265065	22.6065	-	-	TATAGATCAAAGGAAAA	12.235	9866	5892	Transfac	other
V_MTF1_06	0.00479158	9.48041	0.00241291	11.4592	TATAGATCAAAGGAATA	11.8608	13354	6096	Transfac	other
V_MTF1_Q4	0.000210989	16.0356	0.000132291	4.31959	ATTCCCTGAGGGGAA	10.8018	28885	9983	Transfac	other
V_MUSCLEINI_B	0.00013582	14.3491	0.000702279	10.6472	TTGCCCTAGGGCAT	12.0421	88891	12027	Transfac	other
V_MYBL1_04	0.00196929	5.12398	0.00363122	7.00399	ATTGCCTGAGGCGAT	11.6131	8806	5682	Transfac	other
V_MYB_03	0.0115695	6.06304	0.00204696	8.07573	ATCCACAGGTGCGAAAA	12.0106	8157	5325	Transfac	other
V_MYCMAX_02	0.0101898	7.07105	0.00135531	1.27563	TTATGTACTAATAA	16.7847	8613	5412	Transfac	E-box
V_MYCMAX_03	0.00621721	11.4042	0.000176634	12.2705	TCCCCCCCCCCCCCC	13.3231	7556	4868	Transfac	E-box
V_MYCMAX_B	-	-	0.00374301	19.7725	TATTATGGGATGGATAA	14.9196	24174	9097	Transfac	E-box
V_MYC_01	0.0016071	12.2044	0.00227387	16.03	CCCCCCCCCCCACTTG	11.1827	12617	6870	Transfac	E-box
V_MYF6_03	0.000811477	0.590556	0.00189643	0.667052	CCCCCCCGGGGGGGT	10.2456	19883	7964	Transfac	other
V_MYF6_04	0.00233734	6.15084	0.0018301	3.9821	CCCCCCCGGGGGGGT	10.1413	38270	10701	Transfac	other
V_MYF_01	-	-	0.00049876	3.15191	TACATGTGCACATAAAA	14.3825	43218	10358	Transfac	other
V_MYOD_01	0.00112822	22.7972	0.00226888	17.3799	ACCCGTATCAAATTT	4.17498	17634	7856	Transfac	other
V_MYOD_Q6	-	-	0.00457354	4.91905	CGTACAATACGAAATAA	6.63564	23620	8730	Transfac	other
V_MYOD_Q6_01	0.00230931	23.6882	-	-	CTATCCCCGCCCTATT	4.86977	37093	10353	Transfac	other
V_MYOD_Q6_02	0.00739322	7.47496	-	-	GAATGACGAATAAC	8.19645	30913	9228	Transfac	other
V_MYOGENIN_Q6	-	-	0.00148392	15.3338	TGATTGTTAACAGTTGG	7.19545	32161	9429	Transfac	other
V_MYOGNF1_01	0.00224172	16.781	-	-	TGTCGTTACACGTGGAAGGCGGT	15.5897	18105	8228	Transfac	other
V_MZF1_01	-	-	0.000377376	22.3195	CGTTCGGCGCCAAAAGG	10.6562	27597	9735	Transfac	other
V_MZF1_02	0.00197741	12.8577	0.00211525	8.29821	CGTTCGGCGCCAAAAGC	11.5445	41126	9867	Transfac	other
V_NANOG_01	0.00214175	8.94733	-	-	TAGTATTTCCGATCTT	10.3417	9710	5840	Transfac	other
V_NANOG_02	-	-	0.00346518	19.2765	GTTCAAAAAAAAAATTC	6.71831	19759	7292	Transfac	other
V_NERF_01	0.000223676	8.34293	-	-	AAAAATAACAAACGG	6.12016	15854	7611	Transfac	other
V_NERF_Q2	0.00249314	6.33676	0.0037446	11.4151	ATGTCACAACAACAC	7.11543	31325	10216	Transfac	other
V_NEUROD_02	-	-	0.0020574	11.9876	CCGTCTTCCCCCTCAC	4.05621	48264	10936	Transfac	other
V_NF1A_Q6_01	0.00370334	10.1087	-	-	TTTTGTAGATTTTATCGACTTA	9.71714	24592	8959	Transfac	other
V_NF1_Q6	-	-	0.00442676	20.092	GACAGAGATATCAGTTT	9.96736	23992	8876	Transfac	other
V_NF1_Q6_01	0.000162691	0.703738	-	-	GCGGCGATATCGCAGCT	9.89808	19215	8174	Transfac	other
V_NFAT2_Q5	-	-	0.00840323	7.66786	TGGGCGACGTCGTTAA	7.83647	6548	4533	Transfac	other
V_NFAT3_Q3	0.00499145	19.0453	0.00284975	21.386	TGTTCCCATTGTGTACT	9.48947	10650	6136	Transfac	other
V_NFATC2_01	0.00340986	6.15496	0.000669314	11.3542	AAAAACCATTAAGG	8.45964	8113	5163	Transfac	other
V_NFAT_Q4_01	-	-	0.00128393	18.505	ATGGAAAGTCGTAAAA	12.9529	7931	5190	Transfac	other
V_NFAT_Q6	0.0024424	7.38886	-	-	GGAGAAAGGTGCGA	6.21318	10081	5869	Transfac	other
V_NFE2L2_01	0.00561216	15.438	0.00309314	20.8827	GGTATTCTCGGTTGC	7.93952	10095	5923	Transfac	other
V_NFE2_Q6	0.00233115	4.73812	-	-	ACCACTCTCGGTCAC	7.28798	20774	8483	Transfac	other
V_NFE4_Q5	0.000680661	21.128	-	-	GCAAAACATTACTA	5.12717	61995	11513	Transfac	other
V_NFKAPPAB50_01	-	-	0.00132443	18.4489	ATTGATGAGTCACCAA	13.6275	17777	8144	Transfac	other
V_NFKAPPAB65_01	0.000498402	6.9041	-	-	AAGCATACGCCCAACTT	12.5864	11543	5928	Transfac	other
V_NFKB_C	0.00257897	21.4362	-	-	CAATTGCAAAAATAT	8.33696	12708	6661	Transfac	other
V_NFKB_Q6	0.00115975	19.7723	-	-	GAAAAAATTGCAAGG	10.5509	11569	6377	Transfac	other
V_NFKB_Q6_01	-	-	0.000535872	23.9625	GTGCCACGCGACTG	9.22902	17657	7471	Transfac	other
V_NFMUE1_Q6	0.00135566	0.267135	-	-	AAATAAGAAAAAAC	4.27634	12461	6894	Transfac	other
V_NFYC_Q5	0.00222529	17.4391	0.00720066	17.9509	CGACCAACTGCCGTG	12.3104	12888	6811	Transfac	other
V_NFY_01	0.000386136	17.4979	0.00407572	16.5719	AGCAACAGCCGCACC	5.7127	17518	7461	Transfac	other
V_NFY_C	0.000305243	20.2157	-	-	CGCGCCGGGTCACGTA	12.8145	12541	6575	Transfac	other
V_NFY_Q6	0.00260696	19.4533	-	-	ACATGCTACCTAATAC	8.36628	13676	6810	Transfac	other
V_NGFIC_01	8.71e-05	0.984972	0.0023107	4.44796	GCTGGGGGGTACCCCTT	14.1748	29958	9694	Transfac	other
V_NKX11_01	0.00560003	23.3114	0.00227298	1.38559	AGAGCGGGGTCAAGTA	10.0062	4061	2842	Transfac	other
V_NKX21_01	-	-	0.00320765	12.1946	TACCCTAGTTACCGA	12.0841	6535	4448	Transfac	other
V_NKX22_02	0.00146827	22.6162	-	-	TCGCGAAGGTTGTACT	5.80033	5858	4146	Transfac	other
V_NKX25_Q5	0.00237839	20.1363	0.00176341	18.7445	GTATTGGGTGGGTATTT	7.02417	12578	6902	Transfac	other
V_NKX25_Q6	0.00190664	16.0751	-	-	CTCACACAATGGCGC	9.71198	12491	6837	Transfac	other
V_NKX31_02	0.000439528	21.9096	0.000830862	0.0860238	CTATAATTGTTATCG	8.54456	5094	3690	Transfac	other
V_NKX3A_02	0.00306166	19.5305	0.000130898	19.4669	TATCATAATTAAGGA	5.0663	3637	2425	Transfac	other
V_NKX61_01	0.00202851	8.82604	-	-	ACATTCATGACACG	8.48971	4347	3113	Transfac	other
V_NMYC_01	0.00857832	10.0634	-	-	TCACGGAACAATAGGTG	7.89995	10069	5925	Transfac	E-box
V_NR1B2_Q6	0.000825803	23.7321	-	-	AGCCGAAAAAAAAAT	2.71489	18139	7995	Transfac	other
V_NR2F2_04	0.00695106	10.9303	-	-	GGAGATCAATCACTAA	10.6666	18420	8377	Transfac	other
V_NR3C1_01	0.00225941	7.58768	0.00577759	7.28527	ATTGCCTCAGGCAAT	9.70758	6836	4656	Transfac	GR
V_NRF1_Q6	0.00111301	19.1018	0.00200354	14.8656	TACTTGAAAAAAAA	5.57218	27782	8109	Transfac	other
V_NRF1_Q6_01	-	-	0.00134394	23.9192	AAGGCCAGATGGTCCGG	11.6561	52271	10213	Transfac	other
V_NRF2_01	-	-	0.00153247	12.3449	TATCATTAGAACGCT	11.8186	26178	9757	Transfac	other
V_NRF2_Q4	-	-	0.000898411	23.8106	CAATCACTGGCAGAAT	7.72558	10676	6081	Transfac	other
V_NRSE_B	-	-	0.00160797	19.2795	CTTAAGACCACCATTAT	12.4569	17222	8234	Transfac	other
V_NRSF_01	0.00529098	19.1306	0.00110534	15.1483	GTGGTTCAATAATTTTG	8.71418	26385	9527	Transfac	other
V_NRSF_Q4	0.00548628	21.135	0.000607761	22.2705	TGTATATATATACC	6.34796	42230	10821	Transfac	other
V_NURR1_Q3	0.00461178	23.4086	0.000404225	7.14851	GAGCCCTTGTCCCTTG	11.3652	15983	7562	Transfac	other
V_OBOX1_01	-	-	0.00030416	6.86744	AGGAGACCCCCAATTTG	12.5199	4237	3138	Transfac	other
V_OBOX5_05	0.0015704	21.9641	-	-	CGAAGCACACAAAATA	11.9869	4003	3030	Transfac	other
V_OBOX6_06	0.0028922	20.2906	-	-	GTCCATTAATTAATGGA	14.2793	3446	2693	Transfac	other
V_OCAB_Q6	0.00501606	10.1627	-	-	TAATGATGATCACTA	10.2335	5593	3878	Transfac	other
V_OCT1_01	0.00319136	18.4437	-	-	CGACCCAATCAACGGTG	15.2511	4052	2955	Transfac	other
V_OCT1_04	0.00203852	17.8585	-	-	TAGAGGGATTAAATTTC	15.5709	4584	3088	Transfac	other
V_OSR2_03	0.0043279	8.42244	-	-	TGACTCAT	9.35529	8327	5300	Transfac	other
V_OTX1_01	0.00333631	7.44652	-	-	GGAAAA	9.26829	3282	2579	Transfac	other
V_P300_01	0.00830509	19.148	0.00143627	19.8499	TAATTA	8.04195	18409	8379	Transfac	other
V_P50P50_Q3	0.0027797	13.3578	0.00102727	20.7146	TAATTTGCATAT	8.33582	15379	7190	Transfac	other
V_P50RELAP65_Q5_01	0.00616476	21.1561	0.0033488	14.4514	TGACCTTTGGT	11.06	16720	7652	Transfac	other
V_P53DECAMER_Q2	0.00370549	4.09861	-	-	TTTTAT	9.08114	12929	6684	Transfac	other
V_P53_02	-	-	0.00134679	4.55726	GCCACCTGGCTGTT	12.919	8699	5275	Transfac	other
V_P53_04	0.002054	18.8504	-	-	CTGACCTTT	10.9024	22357	8664	Transfac	other
V_P53_05	0.00344781	8.07159	-	-	TGACCCC	7.54736	7602	4784	Transfac	other
V_P73_Q6	0.00215517	4.42676	0.00201231	9.35316	CGCACGTGACC	9.31829	31664	10150	Transfac	other
V_PARP_Q3	-	-	0.00321442	19.6577	CCCGCAT	10.8258	8653	5454	Transfac	other
V_PAX2_01	0.0147173	10.5954	0.00109474	16.257	GGAGAAGCAG	6.44599	5262	3781	Transfac	other
V_PAX2_02	0.000330275	16.1862	0.0012211	1.17155	AGGAAGT	7.18041	10225	6136	Transfac	other
V_PAX3_B	-	-	0.0026967	11.2031	GGGGTATAAAA	6.62704	4057	3125	Transfac	other
V_PAX4_01	0.00392726	21.8478	0.000186925	20.0153	CACCTGG	10.3625	32534	10077	Transfac	other
V_PAX4_02	0.000981697	9.58265	-	-	CTTTTGTGAACTCT	10.9781	2655	2180	Transfac	other
V_PAX4_03	0.00158626	11.5354	0.000652664	4.23159	CACGTGACTCCG	13.8052	34273	9980	Transfac	other
V_PAX4_04	0.00277135	6.80064	5.04e-05	10.7438	TGACCT	8.61326	13371	6466	Transfac	other
V_PAX5_01	0.003079	19.4897	0.000895906	16.5057	TTCGCTTTCCCTT	12.6711	35048	10551	Transfac	other
V_PAX5_02	0.00908391	19.2772	-	-	TCAAAGG	9.35005	11210	6575	Transfac	other
V_PAX5_Q6	-	-	0.00316536	6.02801	TTGACCTCCAGTGACCCCG	14.3793	45434	10946	Transfac	other
V_PAX6_Q2	0.00196809	6.36175	0.000944055	15.4108	CATTCTGTTCT	7.60468	24827	9014	Transfac	other
V_PAX8_B	0.00815238	5.25322	-	-	CAGATGG	11.1664	5632	4090	Transfac	other
V_PAX9_B	0.00196737	20.0432	0.000293609	23.5982	CCAATCAGAA	7.57407	20064	8731	Transfac	other
V_PAX_Q6	0.00791712	10.9948	0.0094259	15.6948	GGCCCGGGCGG	14.3176	15042	7272	Transfac	other
V_PBX1_01	0.0117242	4.38219	0.00684954	4.31559	GGGGGGGGCGGGGCC	12.8049	4635	3166	Transfac	other
V_PBX1_02	0.0101037	19.546	0.000229541	0.893654	TTTGACCTCCAGTGACCCCC	17.1735	5228	3392	Transfac	other
V_PBX1_04	0.0010379	19.4848	-	-	TAACCACTGAGCCACCGAGCC	18.0209	4282	2996	Transfac	other
V_PBX_Q3	0.00144096	12.0018	-	-	TCTTAATTGCT	12.7242	6559	4238	Transfac	other
V_PEA3_Q6_02	0.000813932	0.331366	-	-	GCGCCCCCTGGTGGC	15.6047	9824	5918	Transfac	other
V_PEBP_Q6	0.00460271	17.3293	-	-	TGGGGAACTGCAGCC	11.9716	10721	6243	Transfac	other
V_PIT1_01	-	-	0.00292378	5.91906	AGTCCCTGGGGACTT	13.9138	3054	1759	Transfac	other
V_PITX1_01	0.00539823	20.1656	-	-	ACCGGAAGTGG	13.3989	5265	3792	Transfac	other
V_PITX2_01	0.00496959	19.5074	-	-	GCCCAAGGTCA	11.2238	3215	2516	Transfac	other
V_PITX2_Q2	-	-	0.0104301	17.2365	CATTTCCTGTT	11.6314	6023	4144	Transfac	other
V_PITX2_Q6	5.41e-05	6.62165	-	-	TCCCTAAGTAAACAAAG	12.9476	6072	4116	Transfac	other
V_PITX3_01	0.000967508	18.5048	-	-	ACCGGAAGTGG	13.3989	6277	4479	Transfac	other
V_PITX3_Q2	0.00404916	18.0688	-	-	TCTTATCTGT	11.1897	3883	3106	Transfac	other
V_PKNOX2_01	-	-	0.00314654	12.4669	CTGGTGGGTGCAGATAAGGA	11.39	11291	6327	Transfac	other
V_PLAG1_01	0.000740155	5.56383	0.000539737	2.006	CTGATAACATCTCTG	12.8973	42974	10662	Transfac	other
V_PLAG1_02	-	-	0.000574326	16.7123	AATCACAG	12.394	59619	10986	Transfac	other
V_PLAGL1_03	0.00290122	2.80645	0.000277529	12.1469	AGTCCAAAGTCCAG	12.9539	25991	8746	Transfac	other
V_PMX2A_01	-	-	0.000192206	6.54662	GAGCACGTGGCTGC	12.3066	2138	1429	Transfac	other
V_PNR_01	0.00487292	8.68899	-	-	AGGGGATTTCCAAGG	14.3867	11055	5935	Transfac	other
V_POLY_C	0.00652774	22.006	-	-	CCTCTGATTGGCTGG	13.3635	5493	3934	Transfac	other
V_POU3F3_01	0.00691962	11.2608	-	-	CTCATTTGCATAT	13.7058	3053	2139	Transfac	other
V_PPARA_02	0.00361585	13.9984	0.00275934	16.0853	GGGCAAAGGTCAGGG	9.65717	21091	8491	Transfac	other
V_PPARDR1_Q2	0.00194323	19.4604	0.0013326	20.5567	CCTTTGTTATGCAAA	15.572	27972	9152	Transfac	other
V_PPARGRXRA_01	0.00434787	10.0589	0.00587946	9.19752	AGGGGGCGGGGCCTG	13.6188	41348	10374	Transfac	other
V_PPARG_01	0.00102451	9.60577	-	-	GTGGGGTGAT	12.6108	18961	7784	Transfac	other
V_PPARG_03	0.00315524	8.05806	0.0100978	9.36085	GATTTCCGGGAAATG	15.2101	17565	7729	Transfac	other
V_PPARG_Q6	0.000404265	0.27165	0.000479367	0.693211	TCAGTTTCATTTTCC	16.578	12786	6548	Transfac	other
V_PREP1_01	0.000280997	9.24499	-	-	AGAGATAA	12.0465	9273	5582	Transfac	other
V_PR_02	0.00248268	7.1161	-	-	TCATACTGGAGAGAA	22.0595	10206	5792	Transfac	other
V_PR_Q6	0.00678523	7.88514	-	-	CAGCCCTG	11.9376	17512	7622	Transfac	other
V_PTF1BETA_Q6	0.00495539	8.31778	-	-	CGCCTGTCAATCA	11.168	16788	8085	Transfac	other
V_PU1_Q4	0.00282239	21.5797	-	-	CCGAGACCCCCGCCC	12.0832	32053	9951	Transfac	other
V_PU1_Q6	0.00171637	6.12579	-	-	CCATCTTGGTTGAGG	16.3623	24611	9352	Transfac	other
V_PUR1_Q4	0.00188947	13.0139	0.00320543	15.3057	ACTTCCGCCCGGACC	16.6952	44263	10720	Transfac	other
V_PXRRXR_02	0.0012133	9.69808	5.6e-06	0.510149	GGAAAACCCGGAGCGGAGTTC	16.2267	11083	6151	Transfac	other
V_PXR_Q2	0.00557625	12.1508	-	-	TGATAGAAACCAGA	11.8445	9760	5677	Transfac	other
V_RARA_04	0.00266312	20.5632	0.00325093	17.9541	GGCCACGTGAC	14.8845	15540	7720	Transfac	other
V_RARG_Q3	0.00396064	22.4731	0.00361688	5.92637	GAGGATGACGTCATC	16.1349	17547	7824	Transfac	other
V_RBPJK_01	0.000637948	11.939	-	-	GGGGGCCGCCATCTT	15.9343	9507	5892	Transfac	other
V_RBPJK_Q4	-	-	0.000889503	20.2456	ACACCTGG	11.7081	10826	6206	Transfac	other
V_RELA_Q6	0.00242189	12.9211	-	-	CGGTGCATGCTGGGA	17.4619	15538	7135	Transfac	other
V_RELBP52_01	0.0085738	6.13034	-	-	GAACTACAATTCCCAGAAGGC	25.2529	10141	5821	Transfac	other
V_REST_01	0.00810133	7.38157	-	-	CTCTCCCTCCTCCCC	14.5366	35567	10440	Transfac	other
V_REX1_01	1.21e-05	2.57338	-	-	GGGGGAGGGGA	14.1021	10198	6221	Transfac	other
V_REX1_03	0.00162143	1.51606	0.00397399	13.743	GTCTGTGGTTT	10.4014	23710	9473	Transfac	other
V_RFX1_01	-	-	0.000758728	9.38351	GCCCGGGGG	7.81209	7647	5090	Transfac	other
V_RFX1_02	-	-	0.000181463	12.0952	CACGTG	10.9917	8364	5544	Transfac	other
V_RFX3_04	-	-	0.00217622	17.319	TGCGTG	9.53241	6881	4736	Transfac	other
V_RFX3_05	-	-	0.00290906	13.3349	ATAAGAACATCGTGTACCCGCC	15.7034	12313	6822	Transfac	other
V_RFX4_03	0.0019246	14.3126	-	-	CTAGGTGTGAA	17.8627	8975	5638	Transfac	other
V_RFX4_04	0.00358424	15.5019	-	-	GGAGCACTGAAGCGTAGCGG	12.432	5351	4005	Transfac	other
V_RFX_Q6	0.00297966	18.325	-	-	TGACGTCA	10.1389	7641	5151	Transfac	other
V_RNF96_01	0.00179416	20.6856	0.00220813	21.6348	GAGCCGGAAG	8.81229	75055	11601	Transfac	other
V_RORA1_01	0.00924002	0.535568	-	-	CAAACGTAAACAAT	14.8238	8620	5373	Transfac	RRE
V_RORA2_01	0.0245483	21.7932	0.00186588	4.63329	GTAAACAT	11.9264	5690	4005	Transfac	RRE
V_RORA_Q4	0.0193702	20.1509	-	-	GGTAAGTA	6.50807	7188	4786	Transfac	RRE
V_RORBETA_Q2	0.00821502	19.7405	-	-	TATACATA	6.06853	7624	4800	Transfac	RRE
V_RP58_01	0.00081074	6.82107	-	-	GGATGG	5.73662	14828	7034	Transfac	other
V_RPC155_01	0.00318001	21.4009	0.000242019	18.5351	ACAGATAAGAA	10.8779	12859	6623	Transfac	other
V_RREB1_01	0.0018268	23.8537	0.00079898	5.25282	GGATA	5.68777	88113	10194	Transfac	other
V_RSRFC4_01	-	-	0.00843091	10.6333	AGATAG	6.62989	3075	2477	Transfac	other
V_RUSH1A_02	0.00370984	8.65777	0.000413043	20.6519	TAAAGGAAGG	7.2334	3704	2816	Transfac	other
V_RXRPXR_Q2	0.00351948	10.5131	-	-	GGATGTTTGTTT	13.183	11487	6180	Transfac	other
V_RXRRAR_01	0.00128738	15.9887	0.001109	14.0184	GGTTACGTAATT	11.1469	16669	7707	Transfac	other
V_R_01	-	-	0.000555287	11.288	GGTTAATAATTACC	15.5482	25180	9476	Transfac	other
V_SF1_Q5	-	-	0.000173177	1.08666	GACCACGTGA	12.6854	22897	8712	Transfac	other
V_SF1_Q6	0.00484019	9.73888	-	-	GAGCACGTGGT	14.237	16824	7473	Transfac	other
V_SF1_Q6_01	-	-	0.00862981	7.75936	CTCAGCCAATCAGCGC	12.9251	16821	7412	Transfac	other
V_SIRT6_01	0.00274857	15.9054	-	-	CCGGAAGTGGC	13.3349	7810	5058	Transfac	other
V_SIX4_01	0.000179011	21.7604	-	-	GTAGGTCACGGTGACCTACT	20.3651	6703	4641	Transfac	other
V_SLUG_Q6	0.00236649	10.5041	-	-	CCATCAATCAAA	14.6409	18200	8047	Transfac	other
V_SMAD1_01	0.000518311	19.8547	0.00434916	17.9276	ATCAAGGTCA	13.1897	19189	7696	Transfac	other
V_SMAD3_03	0.00348065	4.39993	-	-	CCCCAAACCACCCCCCCCCC	22.2783	11693	6414	Transfac	other
V_SMAD3_Q6	0.00101811	9.76563	-	-	GGGTCATCGGGTTCA	20.4512	18904	7865	Transfac	other
V_SMAD3_Q6_01	-	-	0.00128631	17.3156	AATTA	9.06307	25019	8762	Transfac	other
V_SMAD4_04	0.00384296	10.9453	0.00162004	14.9486	ACCGGAAGT	14.1232	78770	11630	Transfac	other
V_SMAD4_Q6	0.00835154	6.80384	0.000815628	7.59395	GAACAATGG	9.07881	19723	8664	Transfac	other
V_SMAD_Q6	0.00413918	6.42134	-	-	GGGGCGGGGT	9.71858	8571	5389	Transfac	other
V_SMAD_Q6_01	0.00223476	6.68622	-	-	CCCCGCCCCC	11.1289	16207	7369	Transfac	other
V_SNA_Q4	0.00658402	2.04931	0.00325105	4.30173	CGGAAG	7.2172	23544	9000	Transfac	other
V_SOX11_03	-	-	0.00630648	21.0698	GTAAACAAT	9.19301	12324	6389	Transfac	other
V_SOX12_03	-	-	0.0154459	7.15659	GATTTCCCATCATGCCTTGC	17.5412	4107	3065	Transfac	other
V_SOX12_04	0.000622351	20.9371	0.00196883	4.39363	CATGAC	7.93814	11943	6511	Transfac	other
V_SOX13_03	0.0171084	5.65467	0.00342952	6.45548	CACATTCCTCCG	15.6778	3438	2546	Transfac	other
V_SOX13_04	0.00241429	10.0761	-	-	CGACCATCTGTT	14.0701	20727	8596	Transfac	other
V_SOX14_03	-	-	0.00189241	8.63351	GGTCTGGCAT	10.1436	1702	1209	Transfac	other
V_SOX15_04	0.00305119	7.85587	0.00576422	7.25537	TTTCCG	7.07782	3818	2902	Transfac	other
V_SOX17_04	0.0038962	18.6212	-	-	TGACTCA	9.19332	5146	3638	Transfac	other
V_SOX1_03	0.00231087	5.1954	-	-	TTTCGCAAT	8.71217	2662	2142	Transfac	other
V_SOX1_04	0.0065606	20.0545	-	-	CACCTG	8.30487	2513	2088	Transfac	other
V_SOX21_03	0.000878606	10.0933	-	-	CACGTG	10.4431	2237	1461	Transfac	other
V_SOX4_01	0.00242963	10.9953	-	-	GTATAAAAGGCGGGG	10.0863	6310	4285	Transfac	other
V_SOX5_07	0.00411271	15.2233	-	-	CCAGGTCACCGTGACCCC	17.6826	3022	2418	Transfac	other
V_SOX7_03	0.00443606	8.36508	-	-	GGCCCAGGTCACCCTGACCT	13.5631	3815	2867	Transfac	other
V_SOX7_04	0.00444701	17.2586	-	-	GGGAACATTATGTCCTGT	14.7489	5042	3813	Transfac	other
V_SOX_01	0.00270339	6.01482	0.000682519	5.71791	TGGCACCATGCCAA	19.6649	6988	4630	Transfac	other
V_SOX_Q6	0.00924649	6.16032	-	-	TTAAGTGGA	8.54225	6791	4664	Transfac	other
V_SP1SP3_Q4	0.000685737	10.7112	0.00235965	8.0963	ATCCAC	8.95801	123459	11903	Transfac	other
V_SP1_01	0.000488098	20.7513	0.00251668	22.6447	TAACGTCCGC	13.1967	81241	11942	Transfac	other
V_SP1_02	0.0042046	10.845	6.93e-07	8.19498	CTAATT	9.03956	132793	12178	Transfac	other
V_SP1_03	0.000540629	0.983786	0.000183845	22.3176	ACAACAC	5.26063	165243	12356	Transfac	other
V_SP1_Q2_01	0.00526481	16.4267	0.00463193	19.2315	AAATTAATTAATC	16.3541	144768	12396	Transfac	other
V_SP1_Q4_01	-	-	0.0031105	6.16631	TACTTCCTT	8.6931	158674	12430	Transfac	other
V_SP1_Q6	0.00133084	5.91565	0.00295883	7.42305	GGAAAATGAAACTG	18.4309	149046	12382	Transfac	other
V_SP1_Q6_01	0.000809169	18.385	0.000811283	17.0212	CATTTCCCGGAAACC	13.1188	137511	12342	Transfac	other
V_SP2_01	0.00350129	19.2481	0.00110348	16.5448	GCGCTGTCCATGGTGCTGA	22.9583	60441	11318	Transfac	other
V_SP2_Q3	0.00324549	13.0962	0.00135752	0.473701	TTCAGCACCATGGACAGCGCC	23.1339	173012	12375	Transfac	other
V_SP2_Q3_01	0.00427927	6.29681	0.000918958	9.30608	TGGCCACCAGGGGGCGCTA	17.2051	189481	12356	Transfac	other
V_SP4_03	0.00156641	0.0935974	-	-	AGCTCAAGGTCA	12.8062	87785	11932	Transfac	other
V_SP4_04	0.00351822	8.51671	0.001687	6.36277	CTTTGTTATGCAAAT	14.8078	31693	9736	Transfac	other
V_SP4_Q5	0.00362061	2.17591	0.00102471	22.0265	CCTTTGTTATGCAAA	12.9513	133506	12286	Transfac	other
V_SPDEF_03	-	-	0.00195833	18.6855	TTCCAGGAAG	13.6007	9344	5846	Transfac	other
V_SPI1_03	0.00205614	8.75951	-	-	TGTTTACTTTG	12.5328	17273	8311	Transfac	other
V_SPI1_04	0.000438454	0.324538	-	-	GGAAGGAAGGAAGGAAGG	32.8715	9824	5918	Transfac	other
V_SPIB_02	-	-	0.00173187	5.45217	TTTTCCA	9.85861	12465	7066	Transfac	other
V_SPIB_03	0.00122946	3.64766	-	-	TTAATATTTAAC	16.8212	19431	8774	Transfac	other
V_SPZ1_01	0.00356475	6.93148	-	-	CAGGAAAT	12.1209	37155	10401	Transfac	other
V_SREBP1_01	-	-	0.000172351	1.3919	TGTAAACA	11.7337	12747	5595	Transfac	SREB
V_SREBP1_02	0.00342282	20.3772	0.00130102	4.76822	CACTAATT	8.75889	12943	6809	Transfac	SREB
V_SREBP1_Q5	0.00330832	21.1648	-	-	AGGTCATGGAGAGGTCA	16.0043	35920	10416	Transfac	SREB
V_SREBP1_Q6	0.00170995	20.954	-	-	AAGGTCAC	10.1647	15440	7310	Transfac	SREB
V_SREBP2_Q6	0.00271093	6.51638	1.08e-05	7.02114	TTGGCA	6.98268	34566	10541	Transfac	SREB
V_SREBP_Q3	0.000842887	15.2686	2.11e-05	14.7674	TGCGTGGGCGT	14.4556	16454	7621	Transfac	SREB
V_SREBP_Q6	-	-	0.00186081	11.8586	GGGGCCCAAGGGGG	19.3519	38372	10613	Transfac	SREB
V_SRF_02	0.00264454	8.11201	-	-	CAAGGTCACGGTGACCTG	13.6177	9449	5598	Transfac	other
V_SRF_06	-	-	0.00351617	5.93722	CTTTGT	7.96992	51897	7039	Transfac	other
V_SRF_C	-	-	0.00095344	14.541	GGGTACACGGTGTACCG	16.0474	6686	4044	Transfac	other
V_SRF_Q5_01	0.00559277	15.5644	-	-	AGGATGATGCAATC	19.3757	7406	4719	Transfac	other
V_SRF_Q6	0.00231661	6.19857	-	-	AACATATGTT	11.3814	6690	4568	Transfac	other
V_SRY_01	0.00203169	10.8884	-	-	GCTAAACGGT	7.27919	22839	7226	Transfac	other
V_SRY_02	0.00389227	17.7876	-	-	GCTAATTGCT	6.79328	8059	4496	Transfac	other
V_STAF_01	0.00326019	17.5883	0.00317513	18.7206	TGCTTTCTAGGAATTCA	29.8094	21980	8978	Transfac	other
V_STAF_02	0.000674173	18.214	-	-	GGCACGTGAC	13.3582	25655	9572	Transfac	other
V_STAT1STAT1_Q3	0.00438748	19.2786	-	-	ATTGCGCAAT	13.3136	8798	5430	Transfac	other
V_STAT1_01	-	-	0.000992695	7.29533	CCCGCATACAACGAA	13.9992	8827	5568	Transfac	other
V_STAT1_02	0.00170196	16.5359	-	-	AACACGTGTT	11.9016	13235	7155	Transfac	other
V_STAT1_Q6	-	-	0.00414052	15.9692	AGCGCCACCTAGTGGTA	20.4896	12037	5912	Transfac	other
V_STAT3STAT3_Q3	0.00261923	23.701	-	-	ATCGATAACTGATCGAT	17.7844	10688	6291	Transfac	other
V_STAT3_02	0.00429402	2.08622	0.00199858	2.53109	TAATCGATAA	11.4723	20408	8962	Transfac	other
V_STAT3_03	0.00174673	0.244698	-	-	CCAATTAC	7.9507	26727	9336	Transfac	other
V_STAT4_Q5	0.00433234	18.2318	-	-	AAAAATGGCGCCAAAATG	24.0324	9973	5445	Transfac	other
V_STAT5A_01	0.00126386	14.4438	0.000978317	16.5958	TTTTCCCGCCAAAA	24.1996	8995	5455	Transfac	other
V_STAT5A_Q6	0.0100583	15.0337	-	-	AACCCGGAAGTG	16.2525	12414	5612	Transfac	other
V_STAT5B_01	0.00487327	11.5445	0.00361856	13.839	CACTTCCGGCGGAAGTG	23.343	6559	4419	Transfac	other
V_STAT6_02	0.00804041	6.23659	0.00520655	6.77925	TAATTGGTCAATTA	16.1861	12540	6835	Transfac	other
V_STAT_Q6	0.00143538	16.6898	0.00405503	19.5202	TCACACCTTCTAAGGTGTGA	16.643	16237	7833	Transfac	other
V_STRA13_01	0.00881941	7.10532	0.00390146	3.02303	ACCGGAAATCCGGT	18.4553	10263	5902	Transfac	other
V_SZF11_01	0.00359593	6.29793	0.00137782	4.42617	AAGGTCACGGTGACCTG	22.5403	18399	8275	Transfac	other
V_T3RALPHA_Q6	-	-	0.00164486	22.8664	AAGGTCATTCAAGGTCA	23.2799	19619	8335	Transfac	other
V_T3RBETA_Q6_01	0.00148054	6.60762	0.0028343	6.77482	CAAGGTCATTTCAAGGTCA	22.4049	49099	11162	Transfac	other
V_T3R_01	0.00155219	22.4586	0.00241012	20.4816	TAGGTCAGTCAAGGTCA	24.9981	15105	7365	Transfac	other
V_T3R_Q6	0.00275206	0.232509	-	-	TTCAAGGTCAT	17.7643	17655	7878	Transfac	other
V_TAACC_B	0.000438261	21.2565	-	-	ACCGGAAGTACATCCGGT	20.7324	11233	6212	Transfac	other
V_TAL1ALPHAE47_01	0.00147284	8.36202	-	-	CCGGAAGCGGAAGTG	20.4382	14503	7017	Transfac	other
V_TAL1BETAE47_01	0.00499515	6.01465	-	-	GAATGACACAGCGA	16.2528	12406	6477	Transfac	other
V_TAL1BETAITF2_01	0.00471515	6.06829	0.000872402	10.7024	TATGTAAATAT	12.2411	12513	6487	Transfac	other
V_TAL1_Q6	0.00620424	19.735	-	-	TGTAAATATTGACA	14.5077	22721	8682	Transfac	other
V_TAL1_Q6_01	0.000536291	7.33747	0.0048927	17.5495	GTAAATAAACA	16.1605	23875	8373	Transfac	other
V_TBP_01	0.00471733	0.989234	-	-	ATGTTTACGGTAAACAA	25.8849	2504	2033	Transfac	other
V_TBR2_01	-	-	0.00522279	16.3761	TTTCCCCACACG	15.9526	6545	4427	Transfac	other
V_TBX15_02	0.00912795	21.5824	0.00308411	0.469773	AGATAAGA	7.95698	9879	5868	Transfac	other
V_TBX18_01	0.000849323	0.702897	0.000194254	2.70845	CATGCGGGTA	12.5371	7123	4828	Transfac	other
V_TBX22_01	0.00263854	20.3329	-	-	ATGCGGGTACCCGCAT	16.2707	5633	4025	Transfac	other
V_TBX5_Q5	0.00275599	9.1411	-	-	AGACCCCCCACGAAGC	25.3606	11608	6218	Transfac	other
V_TCF11MAFG_01	0.00515825	12.5257	0.00104261	18.0024	GACCCCCCGCGAAG	16.8707	6705	4446	Transfac	other
V_TCF3_01	0.000417416	7.19888	-	-	AAACCGGTTT	12.1475	18233	7318	Transfac	other
V_TCF3_04	0.000175063	18.4222	-	-	GTGCCAGCCTATGCCAAC	22.5105	6847	4456	Transfac	other
V_TCF4_01	-	-	0.000748317	6.80882	ATGCCCACC	8.4572	6899	4631	Transfac	other
V_TCFAP2A_03	0.000479159	2.59276	0.00656559	6.26495	GAGTCCAAAGTCCATC	20.3046	20314	8605	Transfac	other
V_TCFAP2B_03	0.00836062	8.01939	0.00641599	8.05598	GGGGTCAAAGGTCA	21.7626	21756	8765	Transfac	other
V_TCFAP2B_04	0.00024696	14.2583	0.00548495	17.4499	GGGGTCAAAGTCCAAT	21.0518	14155	7578	Transfac	other
V_TCFAP2E_03	0.00192015	4.38238	0.00149415	20.2665	GTAATAAAA	11.0543	25412	9489	Transfac	other
V_TCFAP2E_04	0.00200041	9.79435	0.0009369	12.1158	GCTCGTAAAAA	14.1903	17929	6591	Transfac	other
V_TCFE2A_03	-	-	0.000508718	11.1361	CCAATAAAAA	12.2088	19232	7892	Transfac	other
V_TCFE2A_04	0.000738477	4.41826	0.00295912	8.83103	TTCTAGAACGTTC	12.5245	18257	7829	Transfac	other
V_TEF1_Q6_03	0.000123057	5.7288	-	-	TTTCGAACG	10.665	8793	5478	Transfac	D-box
V_TEF_Q6	-	-	0.00460155	4.81162	GGGAAACGGAAACCGAAACTG	23.9567	3547	2675	Transfac	D-box
V_TFEB_01	0.00138443	2.45175	-	-	AAAACGAAAATCGATTT	18.0209	6818	4533	Transfac	other
V_TFIIB_Q6	0.0056219	11.593	-	-	GCACTTAA	7.57131	4867	3618	Transfac	other
V_TFIII_Q6	0.00608663	21.2901	0.00028636	6.49136	TTAATCTAATTAA	16.9711	38698	10364	Transfac	other
V_TGIF_01	0.000631468	2.51905	-	-	ATGCCACGCCCCTTTTTG	20.5165	9164	5496	Transfac	other
V_TITF1_Q3	0.00437668	19.2976	0.00684315	16.959	CTCGACCTAATTA	8.25131	5753	4041	Transfac	other
V_TR4_01	0.00539085	18.3554	0.000735969	19.5223	AAAGATCAAAGGGTT	17.861	22481	9165	Transfac	other
V_TR4_03	0.00731406	10.4917	0.000460118	13.7827	TAATTACGCTAATTA	16.709	19611	7885	Transfac	other
V_TR4_Q2	-	-	0.000476965	19.3145	TAATTAGCGCTAATTA	21.2925	20438	8326	Transfac	other
V_TTF1_Q5	0.000694751	23.9659	0.0036643	21.9433	AAAATGCTGACT	11.3362	16413	7804	Transfac	other
V_TWIST_Q6	0.00184429	18.4146	-	-	AGTGCTGACGTAAGCATT	17.4584	22602	8621	Transfac	other
V_UF1H3BETA_Q6	0.00215352	18.7824	0.00168793	18.7837	CACGTGCTAACCACGTG	20.6291	117965	12193	Transfac	other
V_USF_Q6	0.00357422	6.77019	0.000772295	8.04315	CTAATCATCATTAA	18.1026	14977	7584	Transfac	E-box
V_USF_Q6_01	-	-	0.00178668	18.3773	AGGTGTGAAGTCACACCT	23.4599	18586	8354	Transfac	E-box
V_VDRRXR_01	0.000223123	20.5495	-	-	CCAATTAA	9.81658	7348	4890	Transfac	other
V_VDR_Q3	0.00271526	8.13948	0.00405766	17.9839	TTTGCACACGGCAC	20.4069	48927	10736	Transfac	other
V_VDR_Q6	0.00806828	18.3983	0.00334158	16.483	ACCGTTAAACGG	11.4117	13698	7108	Transfac	other
V_VDR_Q6_01	0.0119509	12.1378	0.000639138	16.0529	ACCGTTAACGGT	15.281	14751	7165	Transfac	other
V_VJUN_01	0.00272626	5.82364	-	-	AAAACCGTTAA	10.4326	6642	4654	Transfac	other
V_VMAF_01	0.00324069	12.4799	-	-	GGCCGTTATAACCGTTA	14.556	12896	6868	Transfac	other
V_WT1_Q6	0.00145466	23.6525	-	-	TTTTCCATGGAAAA	20.6127	100968	11796	Transfac	other
V_WT1_Q6_01	-	-	0.000571305	16.9738	GGTGCCAAGT	12.1775	80337	11687	Transfac	other
V_XBP1_01	-	-	0.0043501	15.9673	TTGGCACGGTGCCAA	19.4879	4050	3149	Transfac	other
V_XBP1_02	0.00255508	9.44475	0.00923487	14.4811	TATTACATAACA	11.5534	4097	3250	Transfac	other
V_XFD1_01	0.00032461	6.37616	-	-	AGTGCCAAT	7.68264	5739	3976	Transfac	other
V_XPF1_Q6	0.00575585	17.6399	0.00119909	20.9265	GAGGTCAAAGGTCA	17.2697	14778	7544	Transfac	other
V_XVENT1_01	-	-	0.00650236	5.37525	AAAAGTCAA	11.248	5686	4021	Transfac	other
V_YB1_Q3	0.000886621	1.17884	-	-	AAGTCAATAAGTCA	16.3203	15770	7593	Transfac	other
V_YY1_01	0.00514397	2.58871	0.00166221	9.61275	GAGGTCAAAAGGTCAA	20.2951	7309	4995	Transfac	other
V_YY1_02	0.00680118	19.9828	-	-	GGGGTCAA	10.8326	15886	7809	Transfac	other
V_YY1_Q6	-	-	0.00165028	7.36551	AGGTCAAACTGTGACCT	19.9293	13980	7413	Transfac	other
V_YY1_Q6_02	0.00213689	18.2794	-	-	TGACCTTTAAAGGTCA	26.4197	12510	7002	Transfac	other
V_YY1_Q6_03	0.00231887	9.02786	1.39e-05	17.0736	TTTAAAGGTCA	14.7642	8451	5514	Transfac	other
V_ZBED6_01	-	-	0.000356102	18.0858	TTAATCCG	9.43738	34478	10507	Transfac	other
V_ZBP89_Q4	0.0045379	20.602	0.000741682	8.10156	GTTAATCCGATTAAC	16.6028	95609	11771	Transfac	other
V_ZBRK1_01	0.00455328	7.57785	0.00553602	5.4973	CGTCACGCATGACTGCA	19.6548	19463	8399	Transfac	other
V_ZBTB3_03	0.000822661	5.1389	0.000397503	2.5132	CTTAATCCC	9.309	20150	8440	Transfac	other
V_ZBTB4_04	0.000853845	8.82204	0.00350868	14.6016	AATATGCAAATTAG	14.9579	11989	6472	Transfac	other
V_ZBTB7B_03	-	-	0.00251847	3.8611	CATGAATATTCATA	11.1155	12111	5676	Transfac	other
V_ZBTB7B_04	0.00345422	18.7407	0.00161735	16.3642	ATGCATAATTTA	9.40958	9352	5771	Transfac	other
V_ZBTB7C_Q2	0.00186459	21.8678	0.00150032	18.0627	ATGAATAATTAATG	13.1259	49488	11201	Transfac	other
V_ZEC_01	0.00497874	16.57	0.012659	17.8915	AGCTCATTAT	11.6932	7146	4752	Transfac	other
V_ZF5_01	0.00149851	12.3204	0.000435963	14.5273	AGAAAGTGAAAGTGA	18.4142	32286	9489	Transfac	other
V_ZF5_B	0.000971672	8.90353	0.00238552	4.2688	TTTCAAGGCCCCC	23.9041	22890	8599	Transfac	other
V_ZFP105_03	0.000946598	18.1225	0.00164581	18.1907	CAAGACGCCTTA	16.936	44897	6949	Transfac	other
V_ZFP161_04	0.00165516	22.9204	0.000568257	16.5744	CGTTGCCATGGCAACG	20.2457	29886	9333	Transfac	other
V_ZFP187_04	-	-	0.00260562	20.8292	CGCTGTTAA	8.13388	22053	8747	Transfac	other
V_ZFP206_01	0.00351805	19.019	0.000526721	14.9341	GGATAATCC	8.90119	48740	9731	Transfac	other
V_ZFP281_01	3.37e-05	18.2941	0.00115206	22.0021	TAACTAGGTTAGTAGGTCA	28.8027	135028	12272	Transfac	other
V_ZFP281_04	0.00295054	20.5219	0.00210112	21.9464	AAACCGCAA	11.5507	201363	11548	Transfac	other
V_ZFP281_05	0.000271565	22.9757	-	-	TAACCGCAAACCGCAA	15.4285	6870	4532	Transfac	other
V_ZFP410_03	-	-	0.000281165	13.8391	TAACCGCAAAAACCGCAA	17.3256	9663	5642	Transfac	other
V_ZFP410_04	0.00186905	18.7907	0.00117843	22.8193	GGGTCATGACCC	19.834	87297	11846	Transfac	other
V_ZFP691_03	-	-	0.00500971	1.74947	GAGCAACAGGTGGTT	17.7284	12464	6711	Transfac	other
V_ZFP691_04	-	-	0.00197612	5.05247	CGTCTAGACA	15.611	12891	7009	Transfac	other
V_ZFP740_03	-	-	0.000229735	22.675	AACAATGTTCAGTGTT	29.6852	107550	10130	Transfac	other
V_ZFP740_04	0.00201962	3.96101	-	-	TGAATGTTCAGTCA	25.7828	11075	6039	Transfac	other
V_ZFX_01	1.43e-05	20.0467	0.00019282	8.05206	AACAATTGCATTGTT	23.8025	144229	12074	Transfac	other
V_ZIC1_04	2.85e-05	9.2156	0.000133897	17.6762	TCAATAACATTGA	20.1655	41215	9341	Transfac	other
V_ZIC1_05	-	-	0.003028	7.03753	TGAATAGTCATTCA	19.5138	23309	9137	Transfac	other
V_ZIC2_05	-	-	7.35e-05	10.9681	ATCAATGTGCAGTGAT	28.8776	23214	9216	Transfac	other
V_ZIC3_01	0.00238338	18.6098	0.00663623	19.5179	ATGAATGTGCAGTCAT	28.9492	16300	7823	Transfac	other
V_ZIC3_04	0.00123436	23.3772	0.00392614	2.54603	GAACAATGG	9.59499	43650	9161	Transfac	other
V_ZID_01	-	-	0.0025	8.03748	GTGGTCCCGGATTAT	19.8098	16968	7989	Transfac	other
V_ZNF219_01	0.000806478	20.5157	0.000510937	9.04786	GCAGTAAGAAGTATAC	20.0271	93234	11589	Transfac	other
V_ZNF515_01	-	-	0.000454855	8.24102	ACCATATATGGC	17.4063	28115	9314	Transfac	other
V_ZSCAN4_03	0.00244877	12.9275	-	-	AGGTGTGAAATTCACACCT	31.2592	10341	4907	Transfac	other
V_ZSCAN4_04	-	-	0.00135265	1.18146	TTTCACACCTAGGTGTGAAA	17.4804	11440	6165	Transfac	other
V_ZTA_Q2	-	-	0.00162481	2.12043	AGGTGTGAAAAAAGGTGTGA	26.4371	10818	5987	Transfac	other
Vdr_M213	0.00138316	16.5172	-	-	TTCACACCTCTAGGTGTGAA	28.5102	11613	6484	Selex	other
YY1	0.00280289	20.249	-	-	AGGTGTGAAGGTGTGA	20.5285	18387	8542	Weng	other
YY2_M19	0.0061381	19.5412	-	-	CACACCTGCA	6.93221	8375	5393	Selex	other
YY2_M237	0.00109768	2.20449	-	-	TGCCCCCGGGCA	11.8473	11017	6484	Selex	other
ZBTB49_M219	0.00735609	9.05856	-	-	TGCCCTGAGGGCA	13.3169	11979	6964	Selex	other
ZBTB7A_M21	0.00222573	17.2988	0.00581228	19.3745	CACATTCCAT	9.50836	15038	7558	Selex	other
ZEB1	0.0029139	21.4898	-	-	ACATTCCTGACATTCCA	17.6206	19995	8116	Weng	other
ZIC1_M22	0.00417435	22.6443	0.00549832	1.49012	GTGACCTTATGAGGTCAC	23.2563	31274	10096	Selex	other
ZNF143	0.00174819	8.58744	0.000496052	3.39578	GTGACCTTATTAAGGTCAC	23.3937	38144	10797	Weng	other
ZNF143-ext	0.00345807	12.6647	0.0063301	11.2789	GTGACCTTACATAAGGTCAC	22.8131	24332	9137	Weng	other
ZNF143_M23	0.00509452	9.45019	0.00435658	14.3983	ACATGTCCATGGACATGT	18.4034	14244	7181	Selex	other
ZNF238_M24	0.000769256	23.1753	0.0020582	11.5823	AACATGCCCGGGCATGTC	20.6607	13839	6746	Selex	other
ZNF263	0.00272243	16.3166	0.00242594	20.3011	GAGTTCATCGGGTTCA	21.3179	70385	11635	Weng	other
ZNF281	0.00121994	9.13783	0.00130875	16.1061	ACCGATTAG	11.0461	128513	12426	Weng	other
ZNF282_M221	0.00681858	13.7483	0.00538156	19.9265	CGCTAATCGGAAAACGATTAG	28.0675	9991	5888	Selex	other
ZNF435_M222	0.00569594	23.8962	0.00174856	0.933458	TTTCGCCTGGCACGTCA	22.4042	6629	4453	Selex	other
ZNF524_M28	0.00368574	22.6309	0.000272939	1.37713	AGAAAGGGTTAAT	17.9616	11451	6580	Selex	other
ZNF713_M223	0.00349477	19.1487	7.39e-05	16.1204	CCCCCCCCAC	9.13838	8722	5430	Selex	other
ZNF75A_M29	0.00809152	4.85348	-	-	GACCCCCCGCTGTG	18.7737	15037	7638	Selex	other
ZNF784_M30	0.0107597	11.0626	-	-	TACCCACAATGCATTG	22.0597	7763	5056	Selex	other
ZSCAN4_M31	0.00205898	16.3463	0.00293663	16.4466	ATGTTAAATGTAGATTAAG	25.085	42467	7298	Selex	other
Zfp423_MA0116.1	0.00343765	13.9371	0.00269252	22.443	GGCACCCAGGGGTGC	17.9253	16032	7434	Jaspar	other
Zfp652_M32	0.000647576	16.4719	-	-	CTTTCCCACAACACGAC	20.9693	4776	3548	Selex	other
Zfp740_M33	0.000244698	18.0685	0.000866107	20.7039	TGGTCTAGCCTCGA	20.7592	57256	9500	Selex	other
Zfx_MA0146.1	0.00475114	19.2721	0.00314565	19.5879	GGGGCCGAGGCCTG	13.0766	54692	11368	Jaspar	other
v-JUN	0.00174663	0.959708	-	-	AGTGTTAACAGAACACCT	27.3085	11281	5846	Weng	other
v-Maf	0.000122792	12.8202	-	-	ACCCTCGAACCC	17.5598	10374	5982	Weng	other
znf143_MA0088.1	0.00262247	21.0815	-	-	GATTTCCCATCATGCCTTGC	17.5412	29532	9993	Jaspar	other
